# Supplementary material for: Comparing coordination uranyl(vi) complexes with 2-(1H-imidazo[4,5-b]phenazin-2-yl)phenol and derivatives
Source: Royal Society of Chemistry journal article supplement (doi:10.1039/d1dt02359d), 2021-01-01
Supplement: d1dt02359d2.pdf [file d1dt02359d2.pdf]

## UV-Vis Titration Procedures

Batch titrations were set up for all samples. Stock solutions of **L1**, **L2**, **L3**, and **L4** were made to 0.001 M solution in 40 mL of dimethylformamide (DMF). Metal stock solution of both Cu(II) acetate or  $\text{UO}_2^{2+}$  acetate were made to 0.001 M in 25 mL of DI  $\text{H}_2\text{O}$ . For each ligand batch contained a ligand blank with no metal followed by 14 other samples of 1 equivalent of ligand and introducing 0.1 equivalents of metal stock solution all the way up to 1 equivalent of metal, after reaching 1 equivalent of metal, separate equivalents were added until reaching 5 equivalents of metal. All samples were made and allowed to sit for 24 hours then UV-vis spectra were taken. After the first spectra was taken, 1  $\mu\text{L}$  of 0.1 M TEA in DMF was added to the samples to help facilitate deprotonation. The samples were allowed to sit for 1 hour after addition of TEA then UV-Vis spectra were taken of the samples. All samples were 5 mL in volume and contained 10%  $\text{H}_2\text{O}$ .

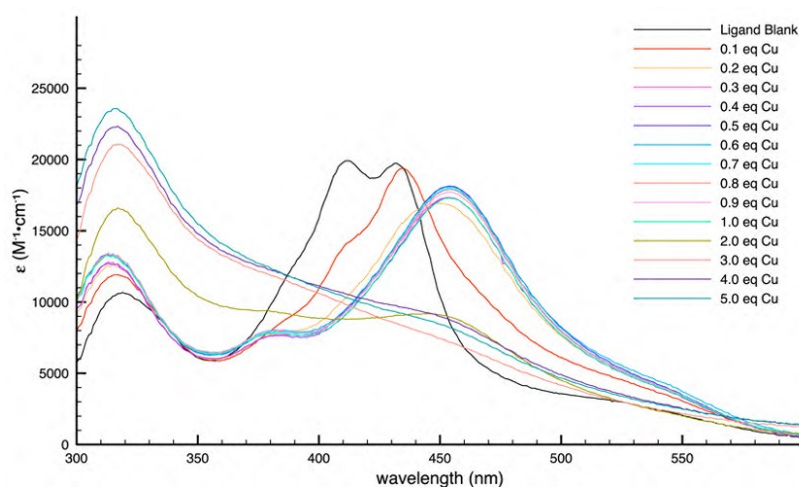

Figure S9. Salimidizine (**L1**) titration with Cu(II)

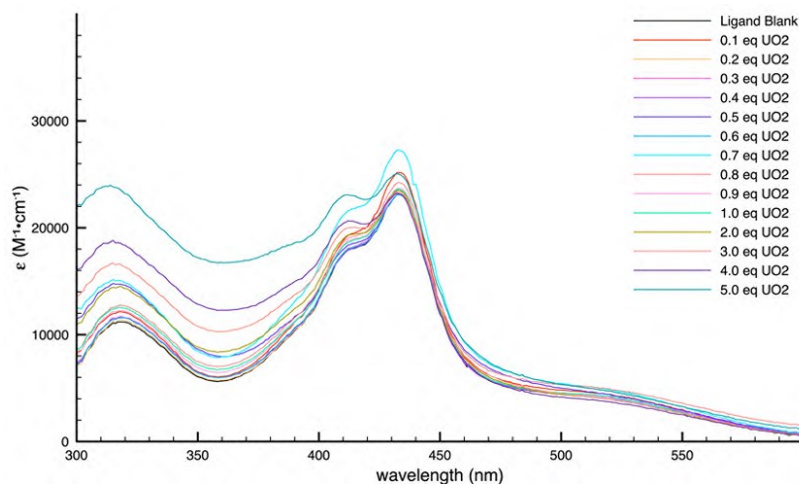

Figure S10. Salimidizine (**L1**) titration with  $\text{UO}_2$

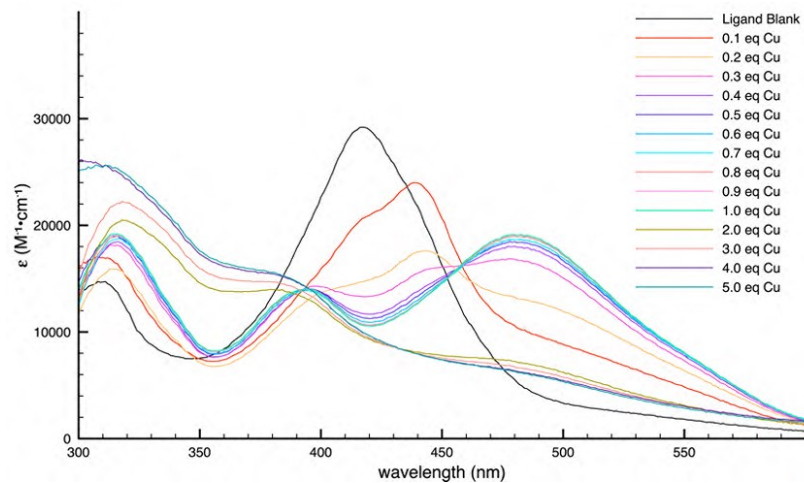

Figure S11. DTB salimidizine (**L2**) titration with Cu (II)

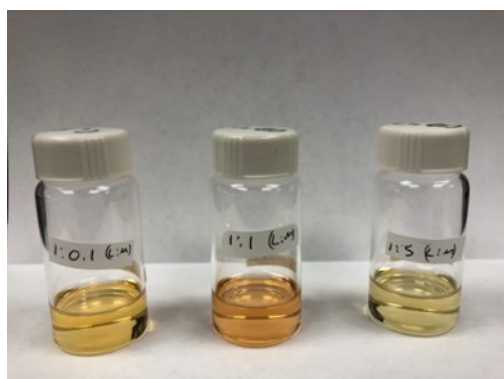

Figure S12. Colorimetric sensing of  $\text{Cu}^{2+}$  in solution.

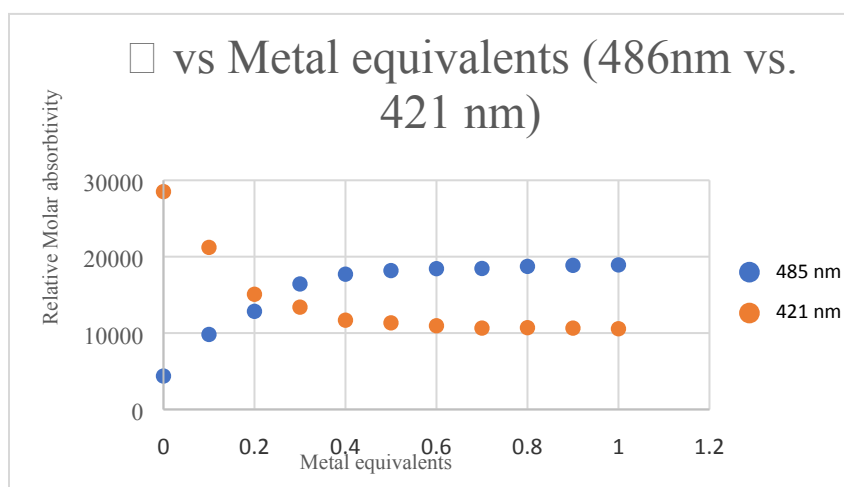

Figure S13.  $\epsilon$  vs Metal equivalents at 486 nm vs. 421 nm

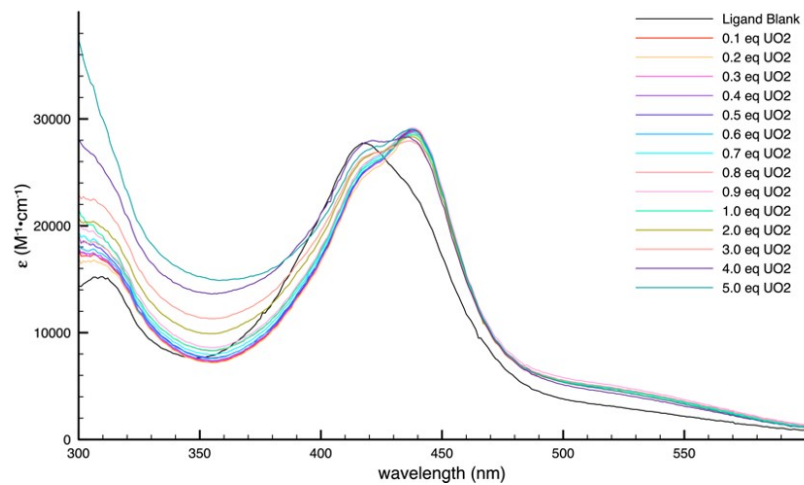

Figure S14. DTB salimidizine (**L2**) titration with  $UO_2$

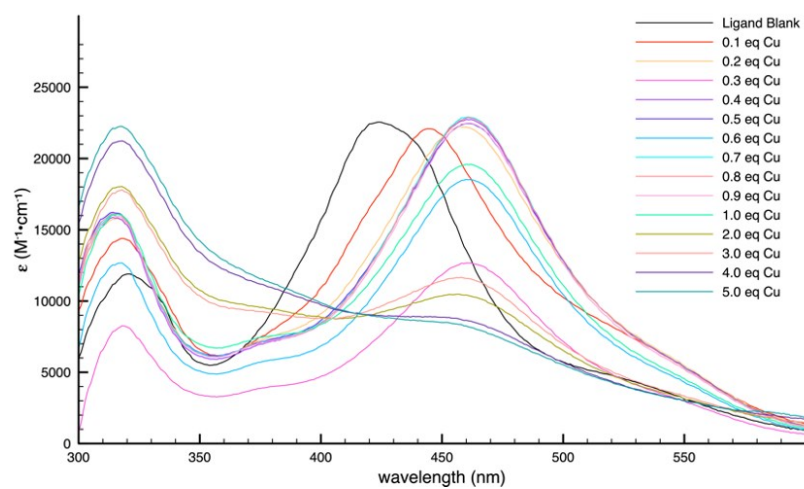

Figure S15. OMe salimidizine (**L3**) titration with  $Cu(II)$

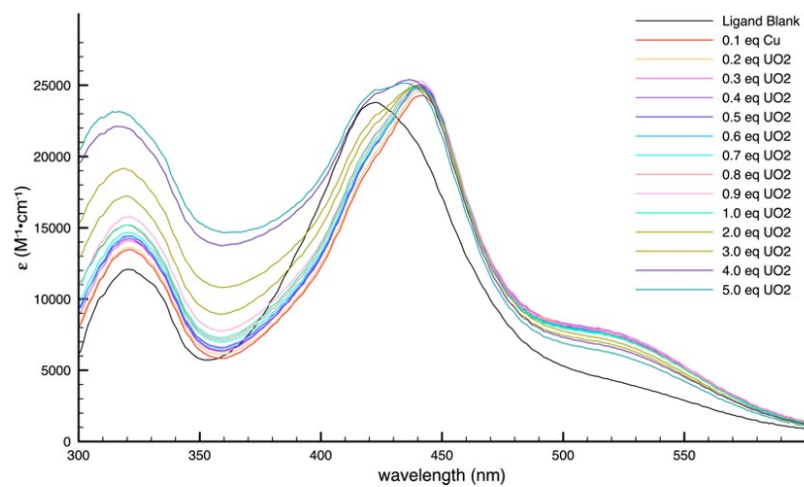

Figure S16. OMe salimidizine (**L3**) titration with  $UO_2$

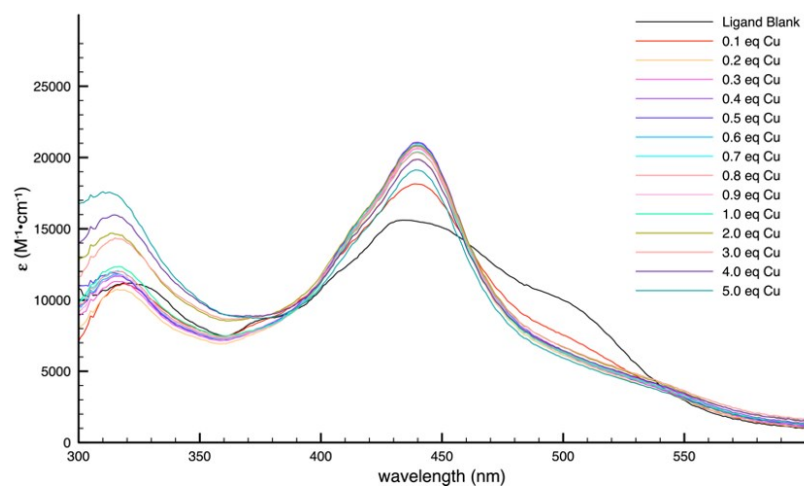

Figure S17. CN salimidizine (**L4**) titration with Cu (II)

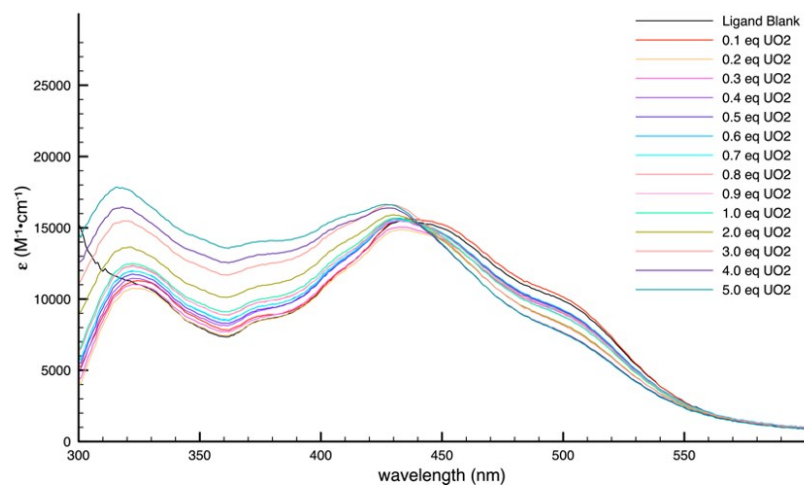

Figure S18. CN salimidizine (**L4**) titration with  $UO_2$
