# Supplementary material for: Comparing coordination uranyl(vi) complexes with 2-(1H-imidazo[4,5-b]phenazin-2-yl)phenol and derivatives
Source: Royal Society of Chemistry journal article supplement (doi:10.1039/d1dt02359d), 2021-01-01
Supplement: d1dt02359d4.pdf [file d1dt02359d4.pdf]

## Mass Spectra

Analysis was performed using a syringe pump with a syringe filled with acetonitrile or sample diluted in acetonitrile at flow rate of 2 to 10  $\mu\text{L}/\text{min}$  into a quadrupole time-of-flight mass spectrometer (Q-ToF Premier, Waters) with electrospray ionization (ESI) in positive mode. Data were collected and processed with Masslynx software (V4.1). The capillary voltage was set at 3.1 kV, the sample cone voltage was 30 V, and the extraction cone was 4.3 V. The source and desolvation temperature were maintained at 105 and 300  $^{\circ}\text{C}$ , respectively, with the desolvation gas flow set at 500 L/h. The Time-of-Flight mass spectrometer scan was 1 s long from 50 to 3000 m/z with a 0.1 s inter-scan delay in the centroid data format. A lock mass was used to correct instrument accuracy with a 0.1  $\mu\text{M}$  solution of HP 1221 (Agilent part number G1969-85003).

### Elemental Composition Report

Page 1

#### Single Mass Analysis

Tolerance = 10.0 PPM / DBE: min = -1.5, max = 50.0

Element prediction: Off

Number of isotope peaks used for i-FIT = 5

Monoisotopic Mass, Even Electron Ions

373 formula(e) evaluated with 4 results within limits (up to 50 closest results for each mass)

Elements Used:

C: 0-100 H: 0-300 N: 0-4 O: 0-10 Na: 0-1

EH\_AG\_baresalimidizine\_bk2\_p61 11 (0.274) Cm (10:16)

1: TOF MS ES+

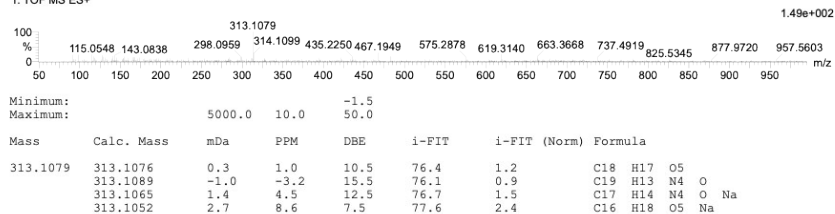

Figure S39. Mass Spectra of Salimidizine (L1)

### Elemental Composition Report

Page 1

#### Single Mass Analysis

Tolerance = 10.0 PPM / DBE: min = -1.5, max = 50.0

Element prediction: Off

Number of isotope peaks used for i-FIT = 5

Monoisotopic Mass, Even Electron Ions

521 formula(e) evaluated with 7 results within limits (up to 50 closest results for each mass)

Elements Used:

C: 0-100 H: 0-300 N: 0-4 O: 0-10 Na: 0-1

EH\_AG\_DTBSalimidizine\_bk2p63 14 (0.329) Cm (14:18)

1: TOF MS ES+

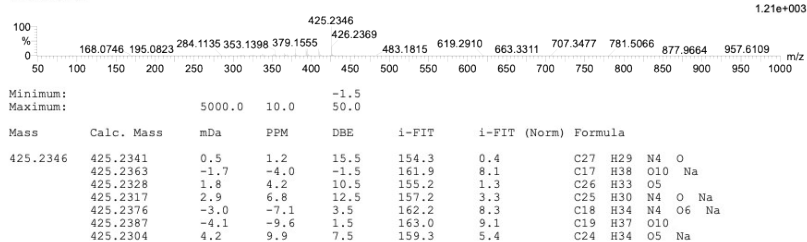

Figure S40. Mass Spectra of DTB-Salimidizine (L2)

Elemental Composition Report

Page 1

Single Mass Analysis

Tolerance = 10.0 PPM / DBE: min = -1.5, max = 50.0

Element prediction: Off

Number of isotope peaks used for i-FIT = 5

Monoisotopic Mass, Even Electron Ions

418 formula(e) evaluated with 5 results within limits (up to 50 closest results for each mass)

Elements Used:

C: 0-100 H: 0-300 N: 0-4 O: 0-10 Na: 0-1

EH\_AG\_OMeSalimidizine\_bk2p65 8 (0.183) Cm (8.9)

1: TOP MS ES+

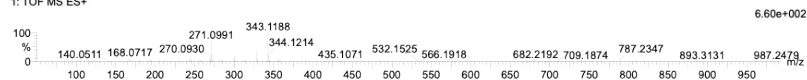

| Mass     | Calc. Mass | mDa  | PPM  | DBE  | i-FIT | i-FIT (Norm) | Formula          |
|----------|------------|------|------|------|-------|--------------|------------------|
| 343.1188 | 343.1182   | 0.6  | 1.7  | 10.5 | 96.6  | 1.3          | C19 H19 O6       |
|          | 343.1195   | -0.7 | -2.0 | 15.5 | 96.2  | 0.8          | C20 H15 N4 O2    |
|          | 343.1171   | 1.7  | 5.0  | 12.5 | 98.5  | 3.2          | C18 H16 N4 O2 Na |
|          | 343.1211   | -2.3 | -6.7 | 16.5 | 96.8  | 1.5          | C23 H16 N2 Na    |
|          | 343.1158   | 3.0  | 8.7  | 7.5  | 100.4 | 5.1          | C17 H20 O6 Na    |

Figure S41. Mass Spectra of OMe-Salimidizine (L3)

Elemental Composition Report

Page 1

Single Mass Analysis

Tolerance = 10.0 PPM / DBE: min = -1.5, max = 50.0

Element prediction: Off

Number of isotope peaks used for i-FIT = 5

Monoisotopic Mass, Even Electron Ions

560 formula(e) evaluated with 5 results within limits (up to 50 closest results for each mass)

Elements Used:

C: 0-100 H: 0-300 N: 0-6 O: 0-10 Na: 0-1

EH\_AG\_CNsalimidizine\_bk2p67 8 (0.183) Cm (7.9)

1: TOP MS ES+

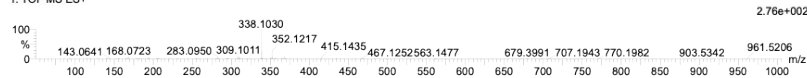

| Mass     | Calc. Mass | mDa  | PPM  | DBE  | i-FIT | i-FIT (Norm) | Formula          |
|----------|------------|------|------|------|-------|--------------|------------------|
| 338.1030 | 338.1028   | 0.2  | 0.6  | 12.5 | 51.8  | 1.1          | C19 H16 N O5     |
|          | 338.1042   | -1.2 | -3.5 | 17.5 | 51.5  | 0.9          | C20 H12 N5 O     |
|          | 338.1018   | 1.2  | 3.5  | 14.5 | 52.1  | 1.5          | C18 H13 N5 O Na  |
|          | 338.1004   | 2.6  | 7.7  | 9.5  | 53.5  | 2.9          | C17 H17 N O5 Na  |
|          | 338.1063   | -3.3 | -9.8 | 0.5  | 58.1  | 7.5          | C10 H21 N O10 Na |

Figure S42. Mass Spectra of CN-Salimidizine (L4)

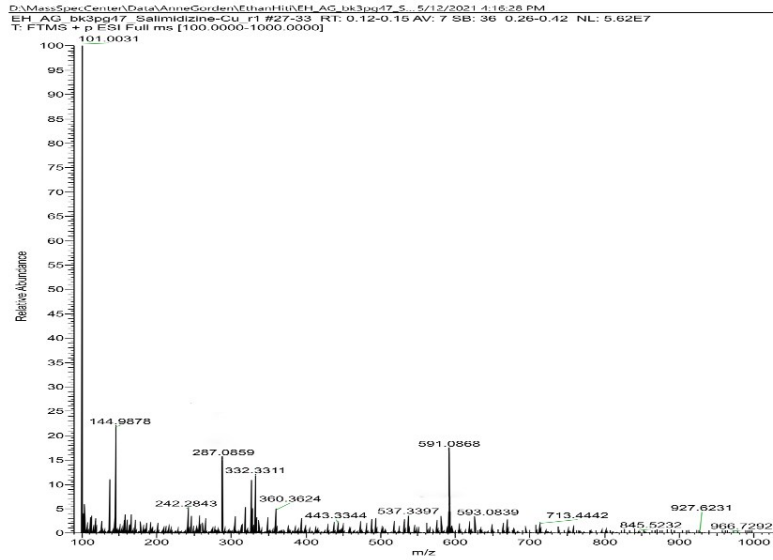

Figure S43. Mass spectra of Salimidizine (L1)-Cu complex

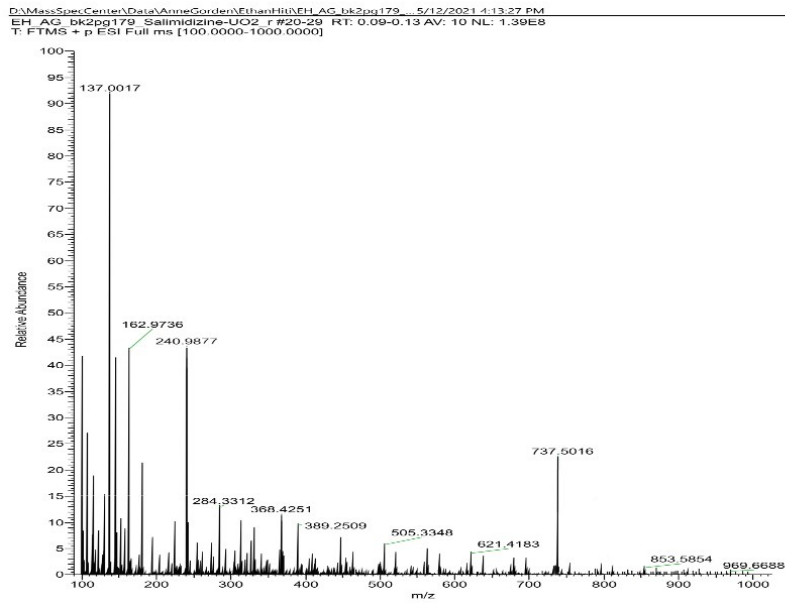

Figure S44. Mass spectra of Salimidizine (L1)-UO<sub>2</sub> complex

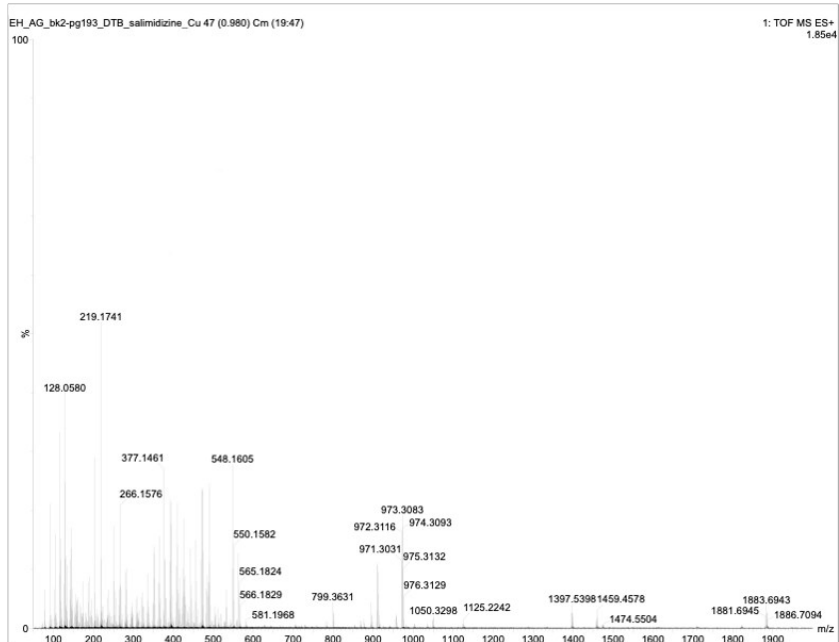

Figure S45. Mass spectra of DTB salimidzine (L2)-Cu complex

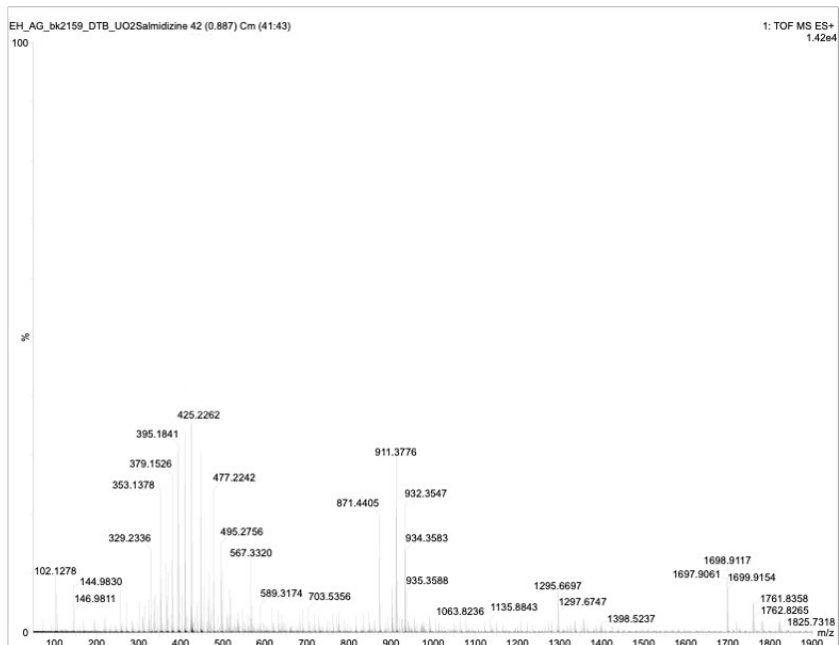

Figure S46. Mass spectra of DTB salimidzine (L2)-UO2 complex

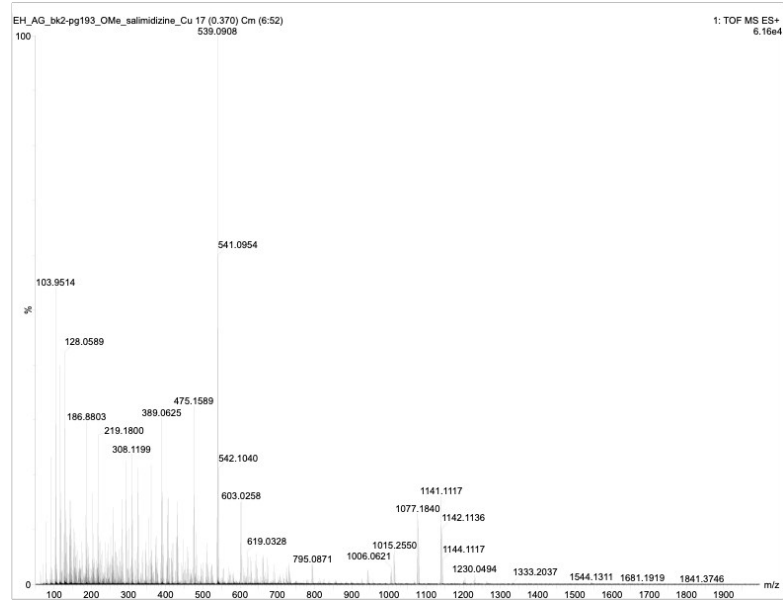

Figure S47. Mass spectra of OMe Salimidizine (L3)-Cu Complex

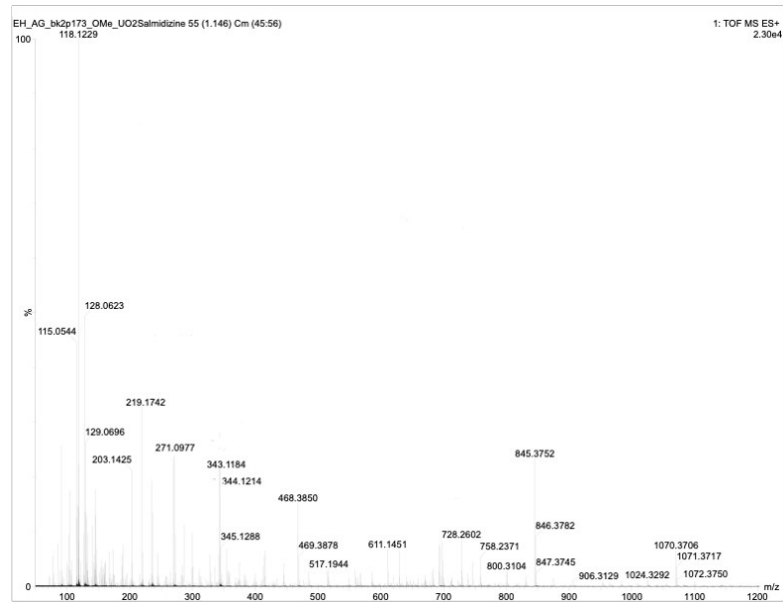

Figure S48. Mass spectra of OMe Salimidizine (L3)-UO2 Complex

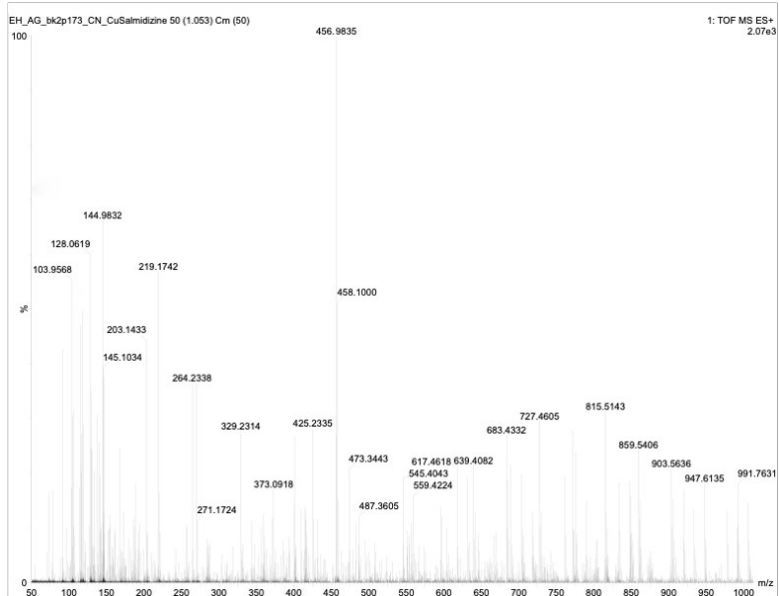

Figure S49. Mass spectra of CN-Salimidzine (L4)- Cu complex

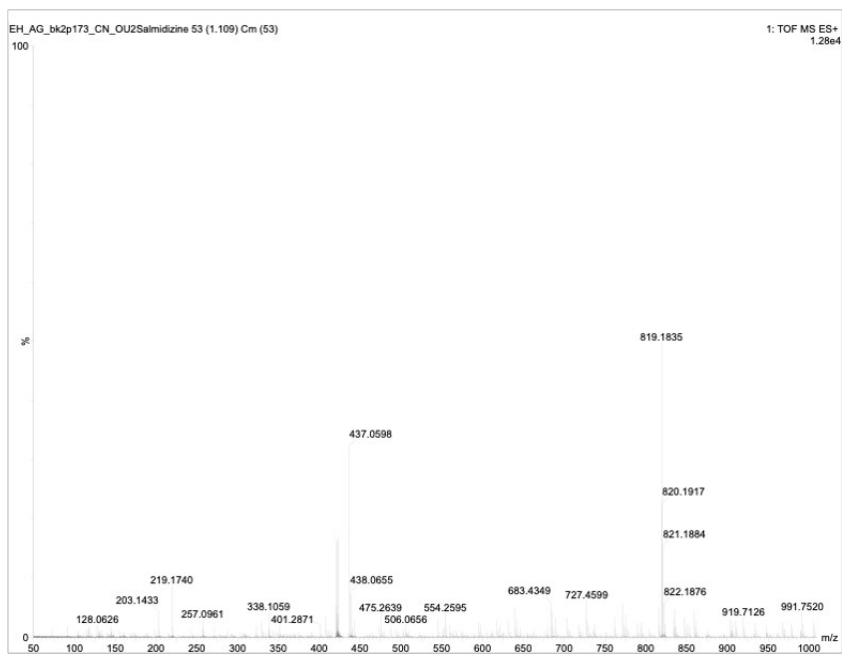

Figure S50. Mass spectra of CN-Salimidzine (L4)- UO<sub>2</sub> complex

**Computational Details (Table S1)**

B3LYP/cc-pVDZ(-PP) Cartesian coordinates (in Å) of the optimal geometries for the ground and pertinent excited electronic state of the investigated uranyl and copper complexes.

| <b>L<sub>1</sub>Cu<sup>2+</sup>(AcO)</b> |           |           |           |                      |           |           |           |
|------------------------------------------|-----------|-----------|-----------|----------------------|-----------|-----------|-----------|
| <b>Ground State</b>                      |           |           |           | <b>Excited State</b> |           |           |           |
| C                                        | 5.942091  | -2.399390 | 0.000228  | C                    | 5.993400  | -2.400341 | 0.004794  |
| C                                        | 5.552291  | -1.075670 | 0.000218  | C                    | 5.571285  | -1.113640 | -0.305673 |
| C                                        | 4.981401  | -3.434910 | 0.000108  | C                    | 5.048269  | -3.359241 | 0.371211  |
| C                                        | 4.176431  | -0.696130 | 0.000078  | C                    | 4.182433  | -0.740403 | -0.257984 |
| C                                        | 3.199051  | -1.751660 | 0.000018  | C                    | 3.207124  | -1.763420 | 0.065838  |
| C                                        | 3.641861  | -3.102570 | 0.000008  | C                    | 3.666026  | -3.022558 | 0.400444  |
| H                                        | 7.006511  | -2.647610 | 0.000338  | H                    | 7.054083  | -2.654147 | -0.028358 |
| H                                        | 6.281631  | -0.264240 | 0.000288  | H                    | 6.273034  | -0.325655 | -0.582315 |
| H                                        | 2.912391  | -3.916330 | -0.000112 | H                    | 2.959957  | -3.797059 | 0.706179  |
| H                                        | 5.290600  | -4.480900 | 0.000078  | H                    | 5.354621  | -4.372482 | 0.633624  |
| C                                        | 1.786801  | -1.456360 | 0.000048  | C                    | 1.754273  | -1.467339 | 0.043146  |
| N                                        | 1.210981  | -0.242540 | 0.000058  | N                    | 1.195145  | -0.260658 | 0.104400  |
| N                                        | 0.817981  | -2.433790 | 0.000108  | N                    | 0.805169  | -2.436356 | -0.015819 |
| C                                        | -0.177549 | -0.430700 | 0.000058  | C                    | -0.204811 | -0.446049 | 0.082724  |
| C                                        | -0.435629 | -1.845650 | 0.000068  | C                    | -0.460167 | -1.833504 | 0.000964  |
| C                                        | -1.212049 | 0.476940  | 0.000038  | C                    | -1.250102 | 0.475355  | 0.107105  |
| C                                        | -1.698709 | -2.382040 | 0.000048  | C                    | -1.739831 | -2.365196 | -0.059829 |
| C                                        | -2.794659 | -1.468950 | -0.000002 | C                    | -2.828495 | -1.455347 | -0.035591 |
| C                                        | -2.545609 | -0.031620 | 0.000008  | C                    | -2.576830 | -0.019181 | 0.047368  |
| N                                        | -3.564129 | 0.848260  | -0.000022 | N                    | -3.596715 | 0.876876  | 0.072147  |
| N                                        | -4.044619 | -1.964670 | -0.000022 | N                    | -4.086180 | -1.955392 | -0.092660 |
| C                                        | -4.807909 | 0.347780  | -0.000052 | C                    | -4.846648 | 0.371343  | 0.016958  |
| C                                        | -5.052499 | -1.079140 | -0.000042 | C                    | -5.094640 | -1.055574 | -0.067222 |
| C                                        | -5.925569 | 1.242910  | -0.000082 | C                    | -5.961642 | 1.258538  | 0.040795  |
| C                                        | -6.403969 | -1.550450 | -0.000082 | C                    | -6.441373 | -1.512788 | -0.124032 |
| C                                        | -7.205719 | 0.751030  | -0.000102 | C                    | -7.255538 | 0.775580  | -0.015712 |
| C                                        | -7.447029 | -0.659590 | -0.000102 | C                    | -7.497232 | -0.619766 | -0.098870 |
| H                                        | -1.047789 | 1.553040  | 0.000068  | H                    | -1.088344 | 1.549433  | 0.177057  |
| H                                        | -1.905199 | -3.452730 | 0.000038  | H                    | -1.950590 | -3.433203 | -0.125937 |
| H                                        | -5.711569 | 2.313180  | -0.000082 | H                    | -5.746205 | 2.327091  | 0.105229  |
| H                                        | -8.055719 | 1.437020  | -0.000122 | H                    | -8.099177 | 1.469794  | 0.003622  |
| H                                        | -8.476889 | -1.023760 | -0.000122 | H                    | -8.524981 | -0.988353 | -0.142936 |
| H                                        | -6.560179 | -2.630710 | -0.000082 | H                    | -6.599552 | -2.591421 | -0.187342 |
| O                                        | 3.902781  | 0.576380  | -0.000012 | O                    | 3.879294  | 0.484778  | -0.486618 |
| H                                        | 0.999741  | -3.426850 | -0.000102 | H                    | 0.982011  | -3.421232 | -0.155750 |
| Cu                                       | 2.224141  | 1.435370  | -0.000232 | Cu                   | 2.198700  | 1.412708  | -0.069877 |
| C                                        | 1.322201  | 5.205280  | 0.000818  | C                    | 1.525467  | 5.203537  | 0.224477  |
| C                                        | 1.691961  | 3.750090  | -0.000212 | C                    | 1.793888  | 3.734978  | 0.106009  |
| H                                        | 2.219371  | 5.835850  | -0.008362 | H                    | 2.346810  | 5.786474  | -0.209025 |
| H                                        | 0.714551  | 5.424670  | 0.892288  | H                    | 1.403926  | 5.460667  | 1.288314  |

| H                                           | 0.697001  | 5.422160  | -0.878942 | H                    | 0.575940  | 5.442106  | -0.277165 |
|---------------------------------------------|-----------|-----------|-----------|----------------------|-----------|-----------|-----------|
| O                                           | 2.900071  | 3.365030  | -0.002272 | O                    | 2.895494  | 3.282595  | -0.349185 |
| O                                           | 0.781011  | 2.849270  | 0.001568  | O                    | 0.920847  | 2.874908  | 0.468705  |
| <b>L<sub>1</sub>Cu<sup>2+</sup>(AcO)(W)</b> |           |           |           |                      |           |           |           |
| <b>Ground State</b>                         |           |           |           | <b>Excited State</b> |           |           |           |
| C                                           | -5.394811 | -3.203752 | -0.068122 | C                    | -5.466654 | -3.166207 | -0.012159 |
| C                                           | -5.152433 | -1.849497 | -0.170893 | C                    | -5.180929 | -1.841719 | -0.323732 |
| C                                           | -4.331481 | -4.119269 | 0.102071  | C                    | -4.430093 | -4.022399 | 0.359549  |
| C                                           | -3.829005 | -1.314540 | -0.106381 | C                    | -3.839660 | -1.324653 | -0.271992 |
| C                                           | -2.747669 | -2.251165 | 0.038908  | C                    | -2.768481 | -2.242566 | 0.054244  |
| C                                           | -3.038950 | -3.638365 | 0.150172  | C                    | -3.091125 | -3.543086 | 0.390801  |
| H                                           | -6.423166 | -3.571453 | -0.113597 | H                    | -6.495340 | -3.528767 | -0.048860 |
| H                                           | -5.963501 | -1.130662 | -0.296657 | H                    | -5.961486 | -1.133440 | -0.604926 |
| H                                           | -2.227040 | -4.354224 | 0.302640  | H                    | -2.307348 | -4.238338 | 0.698672  |
| H                                           | -4.527656 | -5.187874 | 0.198709  | H                    | -4.630996 | -5.061410 | 0.622987  |
| C                                           | -1.380335 | -1.798092 | 0.045078  | C                    | -1.355957 | -1.792672 | 0.026802  |
| N                                           | -0.941144 | -0.527953 | 0.084022  | N                    | -0.927679 | -0.534839 | 0.089868  |
| N                                           | -0.313492 | -2.666577 | 0.002447  | N                    | -0.313669 | -2.659563 | -0.044846 |
| C                                           | 0.460862  | -0.568792 | 0.052780  | C                    | 0.487227  | -0.576905 | 0.056475  |
| C                                           | 0.868944  | -1.947926 | -0.004689 | C                    | 0.883213  | -1.930541 | -0.031925 |
| C                                           | 1.399890  | 0.438404  | 0.055662  | C                    | 1.437524  | 0.442557  | 0.071996  |
| C                                           | 2.180290  | -2.348305 | -0.057989 | C                    | 2.209214  | -2.331119 | -0.099624 |
| C                                           | 3.176336  | -1.327382 | -0.054589 | C                    | 3.202331  | -1.318260 | -0.074736 |
| C                                           | 2.778900  | 0.074045  | 0.003779  | C                    | 2.808152  | 0.084110  | 0.010040  |
| N                                           | 3.698678  | 1.056386  | 0.011153  | N                    | 3.731479  | 1.078357  | 0.035576  |
| N                                           | 4.470378  | -1.688558 | -0.105281 | N                    | 4.503965  | -1.689254 | -0.133759 |
| C                                           | 4.987699  | 0.690432  | -0.040062 | C                    | 5.025962  | 0.701944  | -0.023354 |
| C                                           | 5.379874  | -0.702016 | -0.099370 | C                    | 5.416160  | -0.692894 | -0.109601 |
| C                                           | 6.004914  | 1.697998  | -0.035909 | C                    | 6.045543  | 1.697384  | -0.000660 |
| C                                           | 6.772462  | -1.027868 | -0.152051 | C                    | 6.802493  | -1.012287 | -0.168673 |
| C                                           | 7.328916  | 1.344029  | -0.087524 | C                    | 7.380878  | 1.346961  | -0.059889 |
| C                                           | 7.716185  | -0.032345 | -0.146142 | C                    | 7.762037  | -0.017380 | -0.144424 |
| H                                           | 1.127657  | 1.490701  | 0.106090  | H                    | 1.175096  | 1.497054  | 0.132929  |
| H                                           | 2.495106  | -3.391294 | -0.104420 | H                    | 2.524384  | -3.372734 | -0.171741 |
| H                                           | 5.680541  | 2.739160  | 0.008830  | H                    | 5.723821  | 2.738794  | 0.064158  |
| H                                           | 8.102126  | 2.115509  | -0.084546 | H                    | 8.150438  | 2.122423  | -0.042152 |
| H                                           | 8.777988  | -0.285584 | -0.186678 | H                    | 8.821704  | -0.279925 | -0.190637 |
| H                                           | 7.040742  | -2.084933 | -0.196360 | H                    | 7.068568  | -2.069345 | -0.233289 |
| O                                           | -3.691732 | -0.026406 | -0.192668 | O                    | -3.658344 | -0.076460 | -0.500333 |
| H                                           | -0.393278 | -3.666990 | -0.110063 | H                    | -0.391855 | -3.655455 | -0.196468 |
| Cu                                          | -2.142818 | 1.057305  | 0.075016  | Cu                   | -2.105586 | 1.061632  | -0.003671 |
| O                                           | -0.844718 | 2.304377  | 0.949531  | O                    | -0.948918 | 2.256791  | 1.066788  |
| H                                           | -1.394228 | 3.237666  | 0.918241  | H                    | -1.538126 | 3.134415  | 1.162847  |
| H                                           | -0.635106 | 2.096140  | 1.872422  | H                    | -0.564883 | 1.970221  | 1.907516  |
| C                                           | -4.159367 | 4.754154  | -0.730664 | C                    | -4.171763 | 4.717098  | -0.718750 |
| C                                           | -3.123312 | 3.813244  | -0.153972 | C                    | -3.191971 | 3.761891  | -0.074879 |



|                                                      |           |           |           |                      |           |           |           |
|------------------------------------------------------|-----------|-----------|-----------|----------------------|-----------|-----------|-----------|
| H                                                    | -4.121690 | 4.712376  | -1.829933 | H                    | -3.894247 | 4.865359  | -1.773998 |
| H                                                    | -3.986703 | 5.780006  | -0.382632 | H                    | -4.171488 | 5.678926  | -0.191790 |
| H                                                    | -5.163318 | 4.416439  | -0.429588 | H                    | -5.179619 | 4.274777  | -0.708525 |
| O                                                    | -2.268557 | 4.266757  | 0.654102  | O                    | -2.510830 | 4.140239  | 0.907456  |
| O                                                    | -3.199386 | 2.594288  | -0.540323 | O                    | -3.133148 | 2.588389  | -0.609060 |
| <b>L<sub>1</sub>UO<sub>2</sub><sup>2+</sup>(AcO)</b> |           |           |           |                      |           |           |           |
| <b>Ground State</b>                                  |           |           |           | <b>Excited State</b> |           |           |           |
| C                                                    | 4.544877  | 3.984935  | -0.003402 | C                    | -4.831834 | 3.890710  | -0.088207 |
| C                                                    | 4.366077  | 2.699401  | -0.493735 | C                    | -4.611812 | 2.618782  | 0.421394  |
| C                                                    | 3.468760  | 4.696165  | 0.555993  | C                    | -3.761341 | 4.603957  | -0.631784 |
| C                                                    | 3.103003  | 2.067001  | -0.441600 | C                    | -3.302421 | 2.019187  | 0.395413  |
| C                                                    | 1.998909  | 2.795265  | 0.104019  | C                    | -2.186489 | 2.798335  | -0.110354 |
| C                                                    | 2.216805  | 4.101872  | 0.600268  | C                    | -2.449890 | 4.041243  | -0.641540 |
| H                                                    | 5.535449  | 4.443923  | -0.047028 | H                    | -5.832477 | 4.324780  | -0.072254 |
| H                                                    | 5.193435  | 2.136326  | -0.928188 | H                    | -5.417439 | 2.016810  | 0.843437  |
| H                                                    | 1.391345  | 4.645178  | 1.067326  | H                    | -1.640896 | 4.623184  | -1.086934 |
| H                                                    | 3.616048  | 5.698416  | 0.960646  | H                    | -3.913320 | 5.601115  | -1.046555 |
| C                                                    | 0.654894  | 2.234403  | 0.112100  | C                    | -0.794453 | 2.269093  | -0.069695 |
| N                                                    | 0.304414  | 0.945980  | 0.036950  | N                    | -0.421989 | 1.000398  | -0.199861 |
| N                                                    | -0.460293 | 3.036758  | 0.187336  | N                    | 0.280911  | 3.087248  | 0.070925  |
| C                                                    | -1.092362 | 0.900455  | 0.037931  | C                    | 0.987510  | 0.985695  | -0.145773 |
| C                                                    | -1.596846 | 2.243890  | 0.134557  | C                    | 1.446456  | 2.307694  | 0.033336  |
| C                                                    | -1.950062 | -0.174137 | -0.031706 | C                    | 1.881700  | -0.081877 | -0.228860 |
| C                                                    | -2.935474 | 2.545036  | 0.155090  | C                    | 2.792375  | 2.631170  | 0.140293  |
| C                                                    | -3.850120 | 1.452419  | 0.080535  | C                    | 3.729897  | 1.568317  | 0.063002  |
| C                                                    | -3.352236 | 0.084642  | -0.011520 | C                    | 3.267309  | 0.193835  | -0.121451 |
| N                                                    | -4.197706 | -0.960099 | -0.081025 | N                    | 4.138146  | -0.842272 | -0.202555 |
| N                                                    | -5.168721 | 1.716894  | 0.098561  | N                    | 5.047219  | 1.865093  | 0.162059  |
| C                                                    | -5.509720 | -0.689297 | -0.062421 | C                    | 5.450508  | -0.537922 | -0.102107 |
| C                                                    | -6.003276 | 0.669802  | 0.028895  | C                    | 5.908992  | 0.825319  | 0.082920  |
| C                                                    | -6.451081 | -1.766142 | -0.134288 | C                    | 6.417751  | -1.580093 | -0.178798 |
| C                                                    | -7.417091 | 0.894030  | 0.044646  | C                    | 7.307334  | 1.068074  | 0.181654  |
| C                                                    | -7.797516 | -1.508316 | -0.116324 | C                    | 7.769069  | -1.304282 | -0.078417 |
| C                                                    | -8.285028 | -0.165278 | -0.025960 | C                    | 8.216991  | 0.028675  | 0.103006  |
| H                                                    | -1.614538 | -1.209510 | -0.109692 | H                    | 1.578146  | -1.120331 | -0.381965 |
| H                                                    | -3.331899 | 3.558505  | 0.222961  | H                    | 3.164429  | 3.646850  | 0.278591  |
| H                                                    | -6.051482 | -2.779395 | -0.202669 | H                    | 6.045012  | -2.596847 | -0.318408 |
| H                                                    | -8.512927 | -2.331791 | -0.171376 | H                    | 8.498016  | -2.115997 | -0.138671 |
| H                                                    | -9.363124 | 0.009804  | -0.013800 | H                    | 9.287503  | 0.233324  | 0.180775  |
| H                                                    | -7.762290 | 1.927082  | 0.113975  | H                    | 7.625293  | 2.103398  | 0.320824  |
| O                                                    | 2.954695  | 0.847320  | -0.927701 | O                    | -3.156408 | 0.811140  | 0.790719  |
| H                                                    | -0.440883 | 4.045960  | 0.131062  | H                    | 0.238569  | 4.076144  | 0.277041  |
| U                                                    | 1.956854  | -0.966379 | -0.129624 | U                    | -1.825032 | -1.039369 | 0.084815  |
| O                                                    | 2.534189  | -0.521772 | 1.502393  | O                    | -2.484705 | -0.777294 | -1.549689 |
| O                                                    | 1.304075  | -1.402793 | -1.734778 | O                    | -1.216661 | -1.222008 | 1.744978  |
| C                                                    | 2.333134  | -5.146308 | 0.754614  | C                    | -1.945651 | -5.278686 | -0.369022 |

|                                                         |           |           |           |                      |           |           |           |
|---------------------------------------------------------|-----------|-----------|-----------|----------------------|-----------|-----------|-----------|
| C                                                       | 2.218654  | -3.674516 | 0.475241  | C                    | -1.927209 | -3.785838 | -0.236825 |
| H                                                       | 1.936187  | -5.695184 | -0.115641 | H                    | -1.377726 | -5.706930 | 0.473464  |
| H                                                       | 1.729167  | -5.415368 | 1.631488  | H                    | -1.440534 | -5.578353 | -1.297663 |
| H                                                       | 3.384470  | -5.429013 | 0.894611  | H                    | -2.974843 | -5.657078 | -0.336599 |
| O                                                       | 1.128946  | -3.055287 | 0.731992  | O                    | -0.886614 | -3.119239 | -0.571768 |
| O                                                       | 3.194444  | -3.035807 | -0.044230 | O                    | -2.935056 | -3.153810 | 0.233115  |
| <b>L<sub>1</sub>UO<sub>2</sub><sup>2+</sup>(AcO)(W)</b> |           |           |           |                      |           |           |           |
| <b>Ground State</b>                                     |           |           |           | <b>Excited State</b> |           |           |           |
| C                                                       | 4.156296  | 4.431063  | -0.087906 | C                    | 4.288344  | 4.463747  | -0.035373 |
| C                                                       | 4.086260  | 3.099635  | -0.471907 | C                    | 4.207573  | 3.152249  | -0.481563 |
| C                                                       | 3.010374  | 5.109403  | 0.363084  | C                    | 3.142400  | 5.089946  | 0.459952  |
| C                                                       | 2.866507  | 2.386829  | -0.417123 | C                    | 2.966446  | 2.421222  | -0.439149 |
| C                                                       | 1.692807  | 3.078732  | 0.018230  | C                    | 1.769028  | 3.109141  | 0.010737  |
| C                                                       | 1.799949  | 4.434150  | 0.407874  | C                    | 1.895854  | 4.397385  | 0.481930  |
| H                                                       | 5.115084  | 4.953321  | -0.130948 | H                    | 5.239845  | 4.996838  | -0.061869 |
| H                                                       | 4.968392  | 2.561484  | -0.822053 | H                    | 5.077580  | 2.615871  | -0.862295 |
| H                                                       | 0.919765  | 4.956021  | 0.792058  | H                    | 1.024101  | 4.914402  | 0.887276  |
| H                                                       | 3.071423  | 6.150119  | 0.684284  | H                    | 3.185803  | 6.116330  | 0.826226  |
| C                                                       | 0.392311  | 2.423208  | 0.026294  | C                    | 0.435769  | 2.444684  | -0.024471 |
| N                                                       | 0.135417  | 1.111425  | 0.044246  | N                    | 0.178178  | 1.155312  | 0.159430  |
| N                                                       | -0.777700 | 3.147664  | 0.008075  | N                    | -0.705297 | 3.158807  | -0.214844 |
| C                                                       | -1.255404 | 0.966496  | 0.020957  | C                    | -1.226969 | 1.013784  | 0.090696  |
| C                                                       | -1.854118 | 2.274215  | -0.006757 | C                    | -1.797201 | 2.281935  | -0.153942 |
| C                                                       | -2.034893 | -0.168833 | 0.029504  | C                    | -2.029068 | -0.120240 | 0.215188  |
| C                                                       | -3.210355 | 2.481022  | -0.040998 | C                    | -3.163589 | 2.484363  | -0.288299 |
| C                                                       | -4.045406 | 1.324272  | -0.040644 | C                    | -4.008684 | 1.351302  | -0.165953 |
| C                                                       | -3.451594 | -0.007461 | -0.000665 | C                    | -3.431868 | 0.034014  | 0.088019  |
| N                                                       | -4.221688 | -1.111455 | 0.009061  | N                    | -4.213117 | -1.068774 | 0.216409  |
| N                                                       | -5.379177 | 1.495353  | -0.073087 | N                    | -5.346515 | 1.529635  | -0.289068 |
| C                                                       | -5.549260 | -0.933693 | -0.023887 | C                    | -5.544587 | -0.883082 | 0.093727  |
| C                                                       | -6.137469 | 0.389536  | -0.066293 | C                    | -6.116235 | 0.425434  | -0.162914 |
| C                                                       | -6.412087 | -2.076766 | -0.017272 | C                    | -6.420950 | -1.999340 | 0.217995  |
| C                                                       | -7.563293 | 0.513193  | -0.100582 | C                    | -7.529763 | 0.541297  | -0.282015 |
| C                                                       | -7.773113 | -1.914832 | -0.051046 | C                    | -7.789731 | -1.845977 | 0.096469  |
| C                                                       | -8.354138 | -0.607112 | -0.093113 | C                    | -8.347979 | -0.566973 | -0.155327 |
| H                                                       | -1.622061 | -1.178110 | 0.059964  | H                    | -1.630432 | -1.116882 | 0.409944  |
| H                                                       | -3.676797 | 3.466244  | -0.067348 | H                    | -3.617538 | 3.457347  | -0.479668 |
| H                                                       | -5.941866 | -3.061150 | 0.014060  | H                    | -5.963915 | -2.972138 | 0.410703  |
| H                                                       | -8.428316 | -2.788718 | -0.046624 | H                    | -8.447383 | -2.713167 | 0.193939  |
| H                                                       | -9.441665 | -0.508544 | -0.119722 | H                    | -9.431308 | -0.459108 | -0.249413 |
| H                                                       | -7.980540 | 1.521210  | -0.132509 | H                    | -7.933655 | 1.537202  | -0.475679 |
| O                                                       | 2.820573  | 1.125206  | -0.800455 | O                    | 2.951392  | 1.186561  | -0.765308 |
| H                                                       | -0.826748 | 4.148301  | -0.126655 | H                    | -0.745365 | 4.134867  | -0.474652 |
| U                                                       | 1.898699  | -0.724840 | 0.009307  | U                    | 1.794508  | -0.762587 | 0.077209  |
| O                                                       | 2.350459  | -0.232474 | 1.672913  | O                    | 2.401458  | -0.312398 | 1.701358  |

|   |          |           |           |   |          |           |           |
|---|----------|-----------|-----------|---|----------|-----------|-----------|
| O | 1.326782 | -1.264606 | -1.596828 | O | 1.266758 | -1.170907 | -1.579046 |
| O | 0.501475 | -2.491257 | 0.981619  | O | 0.615876 | -2.451873 | 0.936463  |
| H | 1.036749 | -3.349673 | 0.673275  | H | 1.362134 | -3.666133 | 0.437151  |
| H | 0.474411 | -2.540659 | 1.949705  | H | 0.471018 | -2.538428 | 1.891773  |
| C | 4.302001 | -4.657024 | -0.449192 | C | 4.244165 | -4.755596 | -0.703216 |
| C | 3.123817 | -3.814775 | -0.024955 | C | 3.166491 | -3.834219 | -0.214290 |
| H | 4.570883 | -4.396782 | -1.485506 | H | 4.225571 | -4.745781 | -1.805948 |
| H | 4.059114 | -5.724562 | -0.385954 | H | 4.070045 | -5.782420 | -0.359156 |
| H | 5.172329 | -4.420115 | 0.181145  | H | 5.225810 | -4.386408 | -0.379093 |
| O | 2.022373 | -4.348820 | 0.229193  | O | 2.037423 | -4.389624 | 0.096722  |
| O | 3.330387 | -2.536996 | 0.056917  | O | 3.370030 | -2.597969 | -0.140833 |

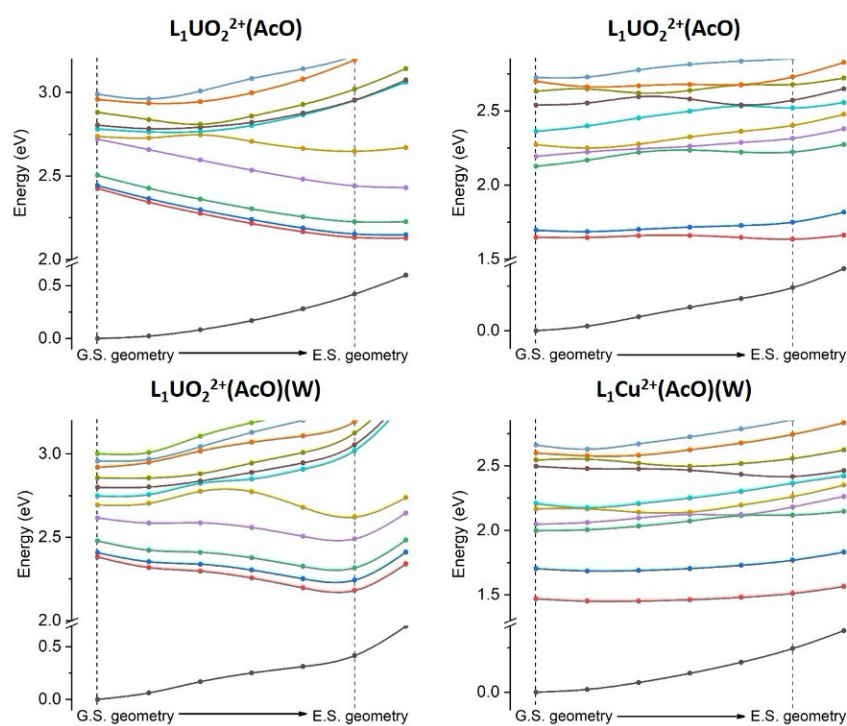

Figure S51. Potential energy profiles for the investigated copper and uranyl complexes

## Crystallographic Tables (Table S2)

### Salimidzine (L1)

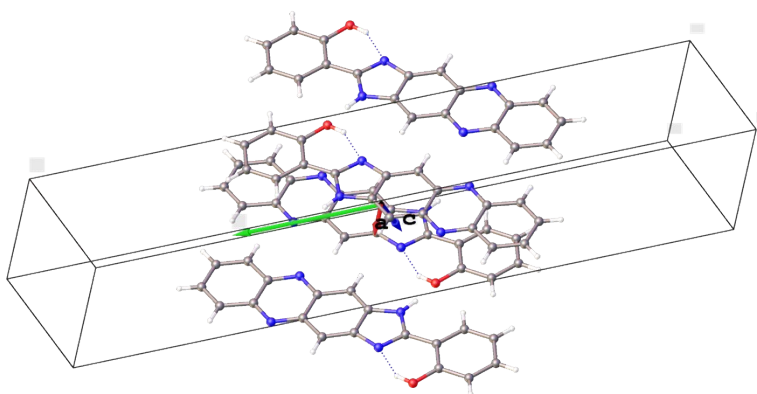

**Table 1 Crystal data and structure refinement for Hiti070117\_0m.**

|                                             |                                                               |
|---------------------------------------------|---------------------------------------------------------------|
| Identification code                         | Hiti070117_0m                                                 |
| Empirical formula                           | C <sub>19</sub> H <sub>12</sub> N <sub>4</sub> O              |
| Formula weight                              | 312.33                                                        |
| Temperature/K                               | ?                                                             |
| Crystal system                              | monoclinic                                                    |
| Space group                                 | P2 <sub>1</sub> /n                                            |
| a/Å                                         | 6.6597(6)                                                     |
| b/Å                                         | 30.064(3)                                                     |
| c/Å                                         | 7.2617(6)                                                     |
| α/°                                         | 90                                                            |
| β/°                                         | 108.293(2)                                                    |
| γ/°                                         | 90                                                            |
| Volume/Å <sup>3</sup>                       | 1380.5(2)                                                     |
| Z                                           | 4                                                             |
| ρ <sub>calc</sub> /cm <sup>3</sup>          | 1.5027                                                        |
| μ/mm <sup>-1</sup>                          | 0.098                                                         |
| F(000)                                      | 648.3                                                         |
| Crystal size/mm <sup>3</sup>                | 0.2 × 0.15 × 0.05                                             |
| Radiation                                   | Mo Kα (λ = 0.71073)                                           |
| 2θ range for data collection/°              | 5.42 to 54.96                                                 |
| Index ranges                                | -8 ≤ h ≤ 8, -39 ≤ k ≤ 39, -9 ≤ l ≤ 9                          |
| Reflections collected                       | 13927                                                         |
| Independent reflections                     | 3173 [R <sub>int</sub> = 0.0386, R <sub>sigma</sub> = 0.0348] |
| Data/restraints/parameters                  | 3173/0/218                                                    |
| Goodness-of-fit on F <sup>2</sup>           | 1.067                                                         |
| Final R indexes [I ≥ 2σ (I)]                | R <sub>1</sub> = 0.0582, wR <sub>2</sub> = 0.1239             |
| Final R indexes [all data]                  | R <sub>1</sub> = 0.0784, wR <sub>2</sub> = 0.1332             |
| Largest diff. peak/hole / e Å <sup>-3</sup> | 0.41/-0.33                                                    |

**Table 2 Fractional Atomic Coordinates (×10<sup>4</sup>) and Equivalent Isotropic Displacement Parameters (Å<sup>2</sup>×10<sup>3</sup>) for Hiti070117\_0m. U<sub>eq</sub> is defined as 1/3 of the trace of the orthogonalised U<sub>ij</sub> tensor.**

| Atom | x        | y          | z        | U(eq)   |
|------|----------|------------|----------|---------|
| N2   | -4687(3) | -1097.8(6) | 395(2)   | 21.2(4) |
| C10  | -2987(3) | -829.6(6)  | 990(3)   | 18.3(4) |
| N3   | -604(3)  | -1402.1(5) | 500(2)   | 20.2(4) |
| C17  | -898(3)  | -984.0(6)  | 1035(3)  | 18.3(4) |
| C16  | -2314(3) | -1665.5(6) | -96(3)   | 20.2(4) |
| C6   | 1733(3)  | 848.2(6)   | 3842(3)  | 18.1(4) |
| C8   | -1524(3) | -125.1(6)  | 2144(3)  | 18.7(4) |
| C11  | -4373(3) | -1512.7(7) | -140(3)  | 20.5(4) |
| C18  | 868(3)   | -694.0(6)  | 1630(3)  | 19.0(4) |
| C19  | 544(3)   | -270.5(6)  | 2168(3)  | 17.9(4) |
| C9   | -3263(3) | -391.2(6)  | 1575(3)  | 19.9(4) |
| C15  | -2101(3) | -2106.6(7) | -730(3)  | 24.8(5) |
| C1   | 3918(3)  | 919.4(6)   | 4238(3)  | 18.8(4) |
| C12  | -6124(3) | -1811.5(7) | -771(3)  | 26.4(5) |
| C2   | 4797(3)  | 1329.3(7)  | 4971(3)  | 23.6(4) |
| C5   | 486(3)   | 1196.8(7)  | 4146(3)  | 23.6(4) |
| C7   | 834(3)   | 416.4(6)   | 3138(3)  | 17.4(4) |
| C3   | 3531(3)  | 1665.0(7)  | 5267(3)  | 26.4(5) |
| C4   | 1360(4)  | 1600.1(7)  | 4840(3)  | 28.2(5) |
| C14  | -3809(3) | -2377.0(7) | -1358(3) | 28.2(5) |
| C13  | -5840(3) | -2227.5(7) | -1369(3) | 29.0(5) |
| O1   | 5211(2)  | 598.2(5)   | 3953(2)  | 25.8(3) |
| N1   | -1249(2) | 309.8(5)   | 2782(2)  | 20.3(4) |
| N4   | 1956(2)  | 81.6(5)    | 2797(2)  | 19.0(4) |

**Table 3 Anisotropic Displacement Parameters ( $\text{\AA}^2 \times 10^3$ ) for Hiti070117\_0m. The Anisotropic displacement factor exponent takes the form:  $-2\pi^2[h^2a^*2U_{11}+2hka^*b^*U_{12}+...]$ .**

| Atom | U <sub>11</sub> | U <sub>22</sub> | U <sub>33</sub> | U <sub>12</sub> | U <sub>13</sub> | U <sub>23</sub> |
|------|-----------------|-----------------|-----------------|-----------------|-----------------|-----------------|
| N2   | 18.6(8)         | 22.6(9)         | 23.0(8)         | -0.1(7)         | 7.5(7)          | 1.7(7)          |
| C10  | 15.9(9)         | 22.2(10)        | 16.9(9)         | 0.1(8)          | 5.3(7)          | 3.4(7)          |
| N3   | 19.4(8)         | 20.4(9)         | 21.7(8)         | 1.0(7)          | 7.6(7)          | 0.8(6)          |
| C17  | 19.7(10)        | 18.7(10)        | 17.3(9)         | 3.0(8)          | 7.1(7)          | 1.3(7)          |
| C16  | 22.2(10)        | 20.7(10)        | 18.5(9)         | 0.0(8)          | 7.4(8)          | 3.2(8)          |
| C6   | 21.0(10)        | 16.8(9)         | 18.1(9)         | 0.2(8)          | 8.7(7)          | 2.5(7)          |
| C8   | 20.7(10)        | 19.3(10)        | 18.3(9)         | 4.3(8)          | 9.2(8)          | 3.2(7)          |
| C11  | 21.2(10)        | 22.8(11)        | 17.9(9)         | 0.5(8)          | 6.8(7)          | 3.4(8)          |
| C18  | 14.2(9)         | 21.6(10)        | 21.9(9)         | 2.5(8)          | 6.8(7)          | 1.0(8)          |
| C19  | 16.7(9)         | 20.2(10)        | 17.6(9)         | 1.5(8)          | 6.4(7)          | 3.6(7)          |
| C9   | 15.6(9)         | 22.2(10)        | 23.5(9)         | 4.9(8)          | 8.6(8)          | 1.7(8)          |
| C15  | 25.9(11)        | 22.6(11)        | 27.2(10)        | 3.0(9)          | 10.2(9)         | 2.9(8)          |
| C1   | 20.6(10)        | 19.0(10)        | 17.6(9)         | 3.5(8)          | 7.3(7)          | 3.5(7)          |
| C12  | 19.5(10)        | 28.6(12)        | 30.9(11)        | -1.8(9)         | 7.5(8)          | 3.0(9)          |
| C2   | 20.9(10)        | 25.7(11)        | 24.6(10)        | -1.4(8)         | 7.6(8)          | 1.8(8)          |
| C5   | 22.5(10)        | 23.4(11)        | 27.8(10)        | 4.4(8)          | 12.2(8)         | 1.4(8)          |
| C7   | 17.5(9)         | 19.2(10)        | 16.5(9)         | 2.9(8)          | 6.9(7)          | 3.2(7)          |
| C3   | 34.8(12)        | 18.3(10)        | 27.0(10)        | -3.8(9)         | 11.0(9)         | -2.4(8)         |
| C4   | 33.8(12)        | 22.1(11)        | 31.8(11)        | 5.8(9)          | 14.7(9)         | -1.9(9)         |

|     |          |          |          |         |         |         |
|-----|----------|----------|----------|---------|---------|---------|
| C14 | 34.6(12) | 17.8(11) | 32.1(11) | -0.2(9) | 10.5(9) | 0.5(9)  |
| C13 | 27.0(12) | 24.6(11) | 34.2(11) | -8.2(9) | 8.1(9)  | 0.9(9)  |
| O1  | 17.1(7)  | 22.0(8)  | 39.8(8)  | 1.5(6)  | 10.9(6) | -3.9(6) |
| N1  | 17.1(8)  | 18.7(9)  | 27.4(8)  | 4.7(7)  | 10.4(7) | -0.1(7) |
| N4  | 18.6(8)  | 16.8(8)  | 21.9(8)  | 1.9(7)  | 6.8(6)  | 0.8(6)  |

**Table 4 Bond Lengths for Hiti070117\_0m.**

| Atom | Atom | Length/Å | Atom | Atom | Length/Å |
|------|------|----------|------|------|----------|
| N2   | C10  | 1.346(2) | C8   | N1   | 1.380(2) |
| N2   | C11  | 1.343(3) | C11  | C12  | 1.429(3) |
| C10  | C17  | 1.457(3) | C18  | C19  | 1.368(3) |
| C10  | C9   | 1.415(3) | C19  | N4   | 1.394(2) |
| N3   | C17  | 1.348(2) | C15  | C14  | 1.356(3) |
| N3   | C16  | 1.342(2) | C1   | C2   | 1.396(3) |
| C17  | C18  | 1.418(3) | C1   | O1   | 1.352(2) |
| C16  | C11  | 1.437(3) | C12  | C13  | 1.356(3) |
| C16  | C15  | 1.426(3) | C2   | C3   | 1.375(3) |
| C6   | C1   | 1.408(3) | C5   | C4   | 1.371(3) |
| C6   | C5   | 1.397(3) | C7   | N1   | 1.367(2) |
| C6   | C7   | 1.453(3) | C7   | N4   | 1.322(2) |
| C8   | C19  | 1.440(3) | C3   | C4   | 1.394(3) |
| C8   | C9   | 1.361(3) | C14  | C13  | 1.423(3) |

**Table 5 Bond Angles for Hiti070117\_0m.**

| Atom | Atom | Atom | Angle/°    | Atom | Atom | Atom | Angle/°    |
|------|------|------|------------|------|------|------|------------|
| C11  | N2   | C10  | 117.24(17) | C18  | C19  | C8   | 120.99(17) |
| C17  | C10  | N2   | 121.17(17) | N4   | C19  | C8   | 108.50(16) |
| C9   | C10  | N2   | 118.62(17) | N4   | C19  | C18  | 130.52(17) |
| C9   | C10  | C17  | 120.21(17) | C8   | C9   | C10  | 117.41(17) |
| C16  | N3   | C17  | 117.24(17) | C14  | C15  | C16  | 120.5(2)   |
| N3   | C17  | C10  | 120.95(17) | C2   | C1   | C6   | 119.67(18) |
| C18  | C17  | C10  | 120.38(17) | O1   | C1   | C6   | 121.80(17) |
| C18  | C17  | N3   | 118.67(17) | O1   | C1   | C2   | 118.53(17) |
| C11  | C16  | N3   | 121.73(18) | C13  | C12  | C11  | 120.1(2)   |
| C15  | C16  | N3   | 119.49(18) | C3   | C2   | C1   | 120.22(19) |
| C15  | C16  | C11  | 118.77(18) | C4   | C5   | C6   | 121.15(19) |
| C5   | C6   | C1   | 118.74(18) | N1   | C7   | C6   | 123.86(17) |
| C7   | C6   | C1   | 119.51(17) | N4   | C7   | C6   | 123.47(17) |
| C7   | C6   | C5   | 121.75(17) | N4   | C7   | N1   | 112.66(17) |
| C9   | C8   | C19  | 123.03(18) | C4   | C3   | C2   | 120.4(2)   |
| N1   | C8   | C19  | 104.96(16) | C3   | C4   | C5   | 119.75(19) |
| N1   | C8   | C9   | 132.01(18) | C13  | C14  | C15  | 120.6(2)   |
| C16  | C11  | N2   | 121.66(18) | C14  | C13  | C12  | 121.1(2)   |

|     |     |     |            |    |    |     |            |
|-----|-----|-----|------------|----|----|-----|------------|
| C12 | C11 | N2  | 119.44(18) | C7 | N1 | C8  | 107.78(16) |
| C12 | C11 | C16 | 118.90(18) | C7 | N4 | C19 | 106.10(16) |
| C19 | C18 | C17 | 117.97(17) |    |    |     |            |

**Table 6 Hydrogen Atom Coordinates ( $\text{\AA} \times 10^4$ ) and Isotropic Displacement Parameters ( $\text{\AA}^2 \times 10^3$ ) for Hiti070117\_0m.**

| Atom | x        | y          | z        | U(eq)   |
|------|----------|------------|----------|---------|
| H18  | 2206(3)  | -788.7(6)  | 1654(3)  | 22.8(5) |
| H9   | -4582(3) | -288.7(6)  | 1571(3)  | 23.8(5) |
| H15  | -778(3)  | -2209.7(7) | -714(3)  | 29.8(5) |
| H12  | -7459(3) | -1720.8(7) | -771(3)  | 31.7(6) |
| H2   | 6244(3)  | 1375.4(7)  | 5259(3)  | 28.3(5) |
| H5   | -961(3)  | 1154.5(7)  | 3872(3)  | 28.3(5) |
| H3   | 4127(3)  | 1937.2(7)  | 5756(3)  | 31.7(6) |
| H4   | 507(4)   | 1829.7(7)  | 5026(3)  | 33.9(6) |
| H14  | -3652(3) | -2662.7(7) | -1785(3) | 33.8(6) |
| H13  | -6993(3) | -2418.3(7) | -1794(3) | 34.8(6) |
| H1   | 4528(8)  | 370(3)     | 3580(40) | 38.7(5) |
| H1a  | -2216(2) | 482.9(5)   | 2929(2)  | 24.3(4) |

### 3,5-Ditertbutylsalimidzine (L2)

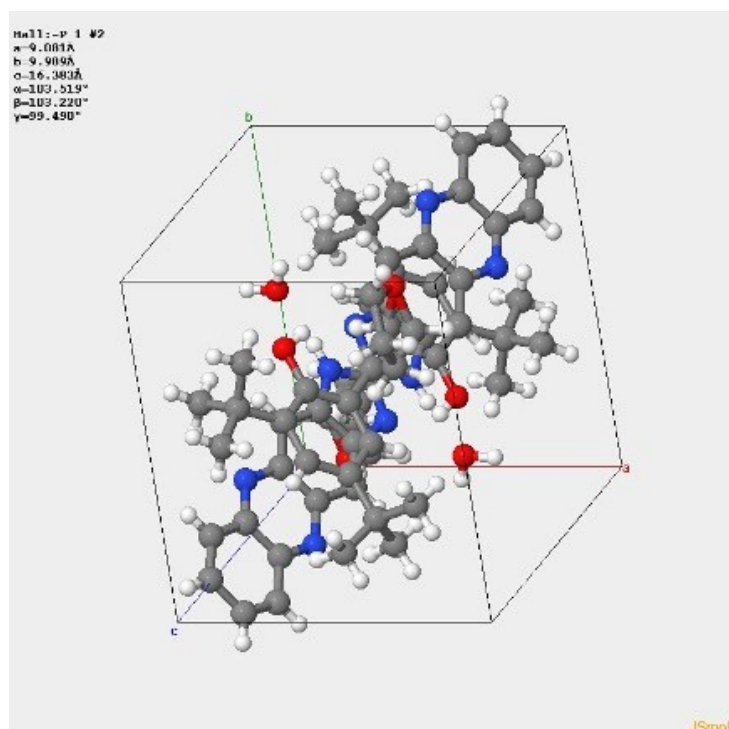

**Table 1. Sample and crystal data for bam126.**

|                     |                                                  |
|---------------------|--------------------------------------------------|
| Identification code | bam126                                           |
| Chemical formula    | $\text{C}_{31}\text{H}_{38}\text{N}_4\text{O}_3$ |

|                               |                            |                               |
|-------------------------------|----------------------------|-------------------------------|
| <b>Formula weight</b>         | 514.65 g/mol               |                               |
| <b>Temperature</b>            | 273(2) K                   |                               |
| <b>Wavelength</b>             | 0.71073 Å                  |                               |
| <b>Crystal size</b>           | 0.070 x 0.100 x 0.110 mm   |                               |
| <b>Crystal habit</b>          | clear orange fragment      |                               |
| <b>Crystal system</b>         | triclinic                  |                               |
| <b>Space group</b>            | P -1                       |                               |
| <b>Unit cell dimensions</b>   | a = 9.0812(5) Å            | $\alpha = 103.5190(10)^\circ$ |
|                               | b = 9.9887(5) Å            | $\beta = 103.2200(10)^\circ$  |
|                               | c = 16.3825(9) Å           | $\gamma = 99.4900(10)^\circ$  |
| <b>Volume</b>                 | 1368.65(13) Å <sup>3</sup> |                               |
| <b>Z</b>                      | 2                          |                               |
| <b>Density (calculated)</b>   | 1.249 g/cm <sup>3</sup>    |                               |
| <b>Absorption coefficient</b> | 0.081 mm <sup>-1</sup>     |                               |
| <b>F(000)</b>                 | 552                        |                               |

**Table 2. Data collection and structure refinement for bam126.**

|                                            |                                                                                                                                  |  |
|--------------------------------------------|----------------------------------------------------------------------------------------------------------------------------------|--|
| <b>Diffractometer</b>                      | Bruker APEX $\kappa$ -geometry diffractometer                                                                                    |  |
| <b>Radiation source</b>                    | microfocus sealed tube (Mo K $\alpha$ , $\lambda = 0.71073$ Å)                                                                   |  |
| <b>Theta range for data collection</b>     | 2.15 to 28.70°                                                                                                                   |  |
| <b>Index ranges</b>                        | -12 ≤ h ≤ 12, -13 ≤ k ≤ 13, -22 ≤ l ≤ 21                                                                                         |  |
| <b>Reflections collected</b>               | 29332                                                                                                                            |  |
| <b>Independent reflections</b>             | 7073 [R(int) = 0.0336]                                                                                                           |  |
| <b>Coverage of independent reflections</b> | 99.8%                                                                                                                            |  |
| <b>Absorption correction</b>               | Multi-Scan                                                                                                                       |  |
| <b>Max. and min. transmission</b>          | 0.9940 and 0.9910                                                                                                                |  |
| <b>Structure solution technique</b>        | direct methods                                                                                                                   |  |
| <b>Structure solution program</b>          | SHELXT 2014/5 (Sheldrick, 2014)                                                                                                  |  |
| <b>Refinement method</b>                   | Full-matrix least-squares on F <sup>2</sup>                                                                                      |  |
| <b>Refinement program</b>                  | SHELXL-2017/1 (Sheldrick, 2017)                                                                                                  |  |
| <b>Function minimized</b>                  | $\Sigma w(F_o^2 - F_c^2)^2$                                                                                                      |  |
| <b>Data / restraints / parameters</b>      | 7073 / 0 / 367                                                                                                                   |  |
| <b>Goodness-of-fit on F<sup>2</sup></b>    | 1.054                                                                                                                            |  |
| <b>Final R indices</b>                     | 5267 data; I > 2 $\sigma$ (I) R1 = 0.0489, wR2 = 0.1266                                                                          |  |
|                                            | all data R1 = 0.0686, wR2 = 0.1411                                                                                               |  |
| <b>Weighting scheme</b>                    | w = 1/[ $\sigma^2(F_o^2) + (0.0633P)^2 + 0.5063P$ ]<br>where P = (F <sub>o</sub> <sup>2</sup> + 2F <sub>c</sub> <sup>2</sup> )/3 |  |
| <b>Largest diff. peak and hole</b>         | 0.430 and -0.278 eÅ <sup>-3</sup>                                                                                                |  |
| <b>R.M.S. deviation from mean</b>          | 0.046 eÅ <sup>-3</sup>                                                                                                           |  |

**Table 3. Atomic coordinates and equivalent isotropic atomic displacement parameters (Å<sup>2</sup>) for**

U(eq) is defined as one third of the trace of the orthogonalized U<sub>ij</sub> tensor.

|    | <b>x/a</b>  | <b>y/b</b>  | <b>z/c</b>  | <b>U(eq)</b> |
|----|-------------|-------------|-------------|--------------|
| O1 | 0.34101(13) | 0.66604(11) | 0.70893(7)  | 0.0339(3)    |
| C1 | 0.93468(19) | 0.11217(17) | 0.30393(11) | 0.0344(3)    |
| C2 | 0.85053(18) | 0.10680(15) | 0.36212(10) | 0.0307(3)    |
| N4 | 0.74673(14) | 0.98087(12) | 0.45223(7)  | 0.0245(2)    |
| C3 | 0.83540(16) | 0.98850(14) | 0.39737(9)  | 0.0236(3)    |



|      | <b>x/a</b>  | <b>y/b</b>  | <b>z/c</b>  | <b>U(eq)</b> |
|------|-------------|-------------|-------------|--------------|
| C6   | 0.63185(16) | 0.85007(14) | 0.53489(9)  | 0.0242(3)    |
| C5   | 0.73100(15) | 0.86455(13) | 0.48070(8)  | 0.0214(3)    |
| C7   | 0.62149(16) | 0.73358(14) | 0.56571(8)  | 0.0220(3)    |
| C9   | 0.57047(16) | 0.57551(14) | 0.63241(8)  | 0.0226(3)    |
| N8   | 0.53665(14) | 0.69534(12) | 0.62050(8)  | 0.0250(2)    |
| C10  | 0.50930(15) | 0.50455(14) | 0.69007(8)  | 0.0220(3)    |
| C11  | 0.56507(16) | 0.39073(14) | 0.71131(9)  | 0.0230(3)    |
| C12  | 0.51321(16) | 0.32659(14) | 0.76927(9)  | 0.0227(3)    |
| C13  | 0.40122(16) | 0.37994(14) | 0.80517(9)  | 0.0240(3)    |
| C14  | 0.34085(16) | 0.49268(14) | 0.78676(9)  | 0.0240(3)    |
| C15  | 0.39694(16) | 0.55582(14) | 0.72802(9)  | 0.0243(3)    |
| C16  | 0.58506(16) | 0.20978(15) | 0.79721(9)  | 0.0249(3)    |
| C17  | 0.59430(18) | 0.09827(15) | 0.71767(10) | 0.0303(3)    |
| C18  | 0.4912(2)   | 0.13341(18) | 0.84657(12) | 0.0388(4)    |
| C19  | 0.75054(19) | 0.27792(18) | 0.85711(11) | 0.0366(4)    |
| C20  | 0.22113(17) | 0.54906(15) | 0.83004(9)  | 0.0279(3)    |
| O1W  | 0.78603(14) | 0.28539(12) | 0.56158(8)  | 0.0352(3)    |
| C21  | 0.2867(2)   | 0.70581(17) | 0.88291(11) | 0.0397(4)    |
| C22  | 0.06869(18) | 0.53274(17) | 0.76012(11) | 0.0337(3)    |
| C24  | 0.01139(19) | 0.00352(17) | 0.27773(11) | 0.0345(3)    |
| C25  | 0.00306(18) | 0.89135(16) | 0.31172(10) | 0.0308(3)    |
| C26  | 0.91450(16) | 0.87970(14) | 0.37200(9)  | 0.0236(3)    |
| N27  | 0.90728(13) | 0.76758(12) | 0.40436(8)  | 0.0241(2)    |
| C28  | 0.81548(15) | 0.75623(13) | 0.45748(8)  | 0.0209(3)    |
| C29  | 0.80315(16) | 0.63686(14) | 0.49070(9)  | 0.0227(3)    |
| C30  | 0.70846(15) | 0.62896(13) | 0.54418(8)  | 0.0212(3)    |
| N31  | 0.67212(13) | 0.53086(12) | 0.58780(7)  | 0.0230(2)    |
| C23  | 0.1820(2)   | 0.46741(18) | 0.89382(11) | 0.0360(4)    |
| O1S  | 0.8159(2)   | 0.93674(15) | 0.89744(10) | 0.0624(4)    |
| C2S  | 0.7876(4)   | 0.7114(2)   | 0.91845(17) | 0.0725(7)    |
| C3S  | 0.8043(3)   | 0.8172(2)   | 0.00370(14) | 0.0601(6)    |
| C4S  | 0.7824(3)   | 0.9488(3)   | 0.97859(16) | 0.0676(6)    |
| C1SA | 0.7518(10)  | 0.7981(5)   | 0.8515(3)   | 0.0555(16)   |
| C1SB | 0.838(2)    | 0.7940(9)   | 0.8649(7)   | 0.064(3)     |

**Table 4. Bond lengths (Å) for bam126.**

|         |            |         |            |
|---------|------------|---------|------------|
| O1-C15  | 1.3566(16) | O1-H1   | 0.82       |
| C1-C2   | 1.356(2)   | C1-C24  | 1.420(2)   |
| C1-H1A  | 0.93       | C2-C3   | 1.4320(18) |
| C2-H2   | 0.93       | N4-C3   | 1.3434(18) |
| N4-C5   | 1.3480(16) | C3-C26  | 1.4327(19) |
| C6-C7   | 1.3704(18) | C6-C5   | 1.4152(19) |
| C6-H6   | 0.93       | C5-C28  | 1.4555(17) |
| C7-N8   | 1.3873(17) | C7-C30  | 1.4378(18) |
| C9-N8   | 1.3298(17) | C9-N31  | 1.3701(17) |
| C9-C10  | 1.4583(18) | C10-C11 | 1.4015(18) |
| C10-C15 | 1.4155(18) | C11-C12 | 1.3868(18) |
| C11-H11 | 0.93       | C12-C13 | 1.4036(18) |

|           |            |           |            |
|-----------|------------|-----------|------------|
| C12-C16   | 1.5364(18) | C13-C14   | 1.3952(18) |
| C13-H13   | 0.93       | C14-C15   | 1.4091(19) |
| C14-C20   | 1.5393(18) | C16-C17   | 1.532(2)   |
| C16-C18   | 1.534(2)   | C16-C19   | 1.536(2)   |
| C17-H17A  | 0.96       | C17-H17B  | 0.96       |
| C17-H17C  | 0.96       | C18-H18A  | 0.96       |
| C18-H18B  | 0.96       | C18-H18C  | 0.96       |
| C19-H19A  | 0.96       | C19-H19B  | 0.96       |
| C19-H19C  | 0.96       | C20-C23   | 1.535(2)   |
| C20-C22   | 1.539(2)   | C20-C21   | 1.542(2)   |
| O1W-H1W   | 0.89(2)    | O1W-H2W   | 0.84(2)    |
| C21-H21A  | 0.96       | C21-H21B  | 0.96       |
| C21-H21C  | 0.96       | C22-H22A  | 0.96       |
| C22-H22B  | 0.96       | C22-H22C  | 0.96       |
| C24-C25   | 1.362(2)   | C24-H24   | 0.93       |
| C25-C26   | 1.4219(19) | C25-H25   | 0.93       |
| C26-N27   | 1.3449(16) | N27-C28   | 1.3461(17) |
| C28-C29   | 1.4205(17) | C29-C30   | 1.3667(18) |
| C29-H29   | 0.93       | C30-N31   | 1.3815(16) |
| N31-H31   | 0.86       | C23-H23A  | 0.96       |
| C23-H23B  | 0.96       | C23-H23C  | 0.96       |
| O1S-C1SA  | 1.367(5)   | O1S-C4S   | 1.413(3)   |
| O1S-C1SB  | 1.466(8)   | C2S-C1SB  | 1.436(10)  |
| C2S-C3S   | 1.500(3)   | C2S-C1SA  | 1.560(6)   |
| C2S-H2SA  | 0.97       | C2S-H2SB  | 0.97       |
| C3S-C4S   | 1.496(3)   | C3S-H3SA  | 0.97       |
| C3S-H3SB  | 0.97       | C4S-H4SC  | 0.97       |
| C4S-H4SD  | 0.97       | C1SA-H1SA | 0.97       |
| C1SA-H1SB | 0.97       | C1SB-H1SC | 0.97       |
| C1SB-H1SD | 0.97       |           |            |

**Table 5. Bond angles (°) for bam126.**

|             |            |             |            |
|-------------|------------|-------------|------------|
| C15-O1-H1   | 109.5      | C2-C1-C24   | 121.44(13) |
| C2-C1-H1A   | 119.3      | C24-C1-H1A  | 119.3      |
| C1-C2-C3    | 119.97(14) | C1-C2-H2    | 120.0      |
| C3-C2-H2    | 120.0      | C3-N4-C5    | 117.43(11) |
| N4-C3-C2    | 119.74(12) | N4-C3-C26   | 121.57(12) |
| C2-C3-C26   | 118.69(13) | C7-C6-C5    | 117.91(12) |
| C7-C6-H6    | 121.0      | C5-C6-H6    | 121.0      |
| N4-C5-C6    | 118.72(12) | N4-C5-C28   | 121.05(12) |
| C6-C5-C28   | 120.22(11) | C6-C7-N8    | 129.68(12) |
| C6-C7-C30   | 121.43(12) | N8-C7-C30   | 108.88(11) |
| N8-C9-N31   | 112.78(11) | N8-C9-C10   | 122.56(12) |
| N31-C9-C10  | 124.61(12) | C9-N8-C7    | 105.82(11) |
| C11-C10-C15 | 119.74(12) | C11-C10-C9  | 120.97(12) |
| C15-C10-C9  | 119.23(12) | C12-C11-C10 | 121.57(12) |
| C12-C11-H11 | 119.2      | C10-C11-H11 | 119.2      |
| C11-C12-C13 | 117.01(12) | C11-C12-C16 | 120.72(12) |
| C13-C12-C16 | 122.13(12) | C14-C13-C12 | 124.31(12) |

|               |            |               |            |
|---------------|------------|---------------|------------|
| C14-C13-H13   | 117.8      | C12-C13-H13   | 117.8      |
| C13-C14-C15   | 117.11(12) | C13-C14-C20   | 121.94(12) |
| C15-C14-C20   | 120.93(12) | O1-C15-C14    | 118.61(12) |
| O1-C15-C10    | 121.12(12) | C14-C15-C10   | 120.27(12) |
| C17-C16-C18   | 107.66(12) | C17-C16-C19   | 108.64(12) |
| C18-C16-C19   | 108.89(13) | C17-C16-C12   | 110.99(11) |
| C18-C16-C12   | 112.26(11) | C19-C16-C12   | 108.33(12) |
| C16-C17-H17A  | 109.5      | C16-C17-H17B  | 109.5      |
| H17A-C17-H17B | 109.5      | C16-C17-H17C  | 109.5      |
| H17A-C17-H17C | 109.5      | H17B-C17-H17C | 109.5      |
| C16-C18-H18A  | 109.5      | C16-C18-H18B  | 109.5      |
| H18A-C18-H18B | 109.5      | C16-C18-H18C  | 109.5      |
| H18A-C18-H18C | 109.5      | H18B-C18-H18C | 109.5      |
| C16-C19-H19A  | 109.5      | C16-C19-H19B  | 109.5      |
| H19A-C19-H19B | 109.5      | C16-C19-H19C  | 109.5      |
| H19A-C19-H19C | 109.5      | H19B-C19-H19C | 109.5      |
| C23-C20-C22   | 107.45(13) | C23-C20-C14   | 111.61(12) |
| C22-C20-C14   | 110.20(12) | C23-C20-C21   | 107.23(13) |
| C22-C20-C21   | 110.11(13) | C14-C20-C21   | 110.16(12) |
| H1W-O1W-H2W   | 103.6(18)  | C20-C21-H21A  | 109.5      |
| C20-C21-H21B  | 109.5      | H21A-C21-H21B | 109.5      |
| C20-C21-H21C  | 109.5      | H21A-C21-H21C | 109.5      |
| H21B-C21-H21C | 109.5      | C20-C22-H22A  | 109.5      |
| C20-C22-H22B  | 109.5      | H22A-C22-H22B | 109.5      |
| C20-C22-H22C  | 109.5      | H22A-C22-H22C | 109.5      |
| H22B-C22-H22C | 109.5      | C25-C24-C1    | 120.19(14) |
| C25-C24-H24   | 119.9      | C1-C24-H24    | 119.9      |
| C24-C25-C26   | 120.56(14) | C24-C25-H25   | 119.7      |
| C26-C25-H25   | 119.7      | N27-C26-C25   | 119.51(12) |
| N27-C26-C3    | 121.37(12) | C25-C26-C3    | 119.11(12) |
| C26-N27-C28   | 117.78(11) | N27-C28-C29   | 118.73(11) |
| N27-C28-C5    | 120.60(11) | C29-C28-C5    | 120.66(12) |
| C30-C29-C28   | 116.97(12) | C30-C29-H29   | 121.5      |
| C28-C29-H29   | 121.5      | C29-C30-N31   | 132.04(12) |
| C29-C30-C7    | 122.77(12) | N31-C30-C7    | 105.18(11) |
| C9-N31-C30    | 107.33(11) | C9-N31-H31    | 126.3      |
| C30-N31-H31   | 126.3      | C20-C23-H23A  | 109.5      |
| C20-C23-H23B  | 109.5      | H23A-C23-H23B | 109.5      |
| C20-C23-H23C  | 109.5      | H23A-C23-H23C | 109.5      |
| H23B-C23-H23C | 109.5      | C1SA-O1S-C4S  | 104.2(3)   |
| C4S-O1S-C1SB  | 108.6(4)   | C1SB-C2S-C3S  | 104.9(4)   |
| C3S-C2S-C1SA  | 102.4(3)   | C3S-C2S-H2SA  | 111.3      |
| C1SA-C2S-H2SA | 111.3      | C3S-C2S-H2SB  | 111.3      |
| C1SA-C2S-H2SB | 111.3      | H2SA-C2S-H2SB | 109.2      |
| C4S-C3S-C2S   | 103.83(18) | C4S-C3S-H3SA  | 111.0      |
| C2S-C3S-H3SA  | 111.0      | C4S-C3S-H3SB  | 111.0      |
| C2S-C3S-H3SB  | 111.0      | H3SA-C3S-H3SB | 109.0      |
| O1S-C4S-C3S   | 107.13(17) | O1S-C4S-H4SC  | 110.3      |
| C3S-C4S-H4SC  | 110.3      | O1S-C4S-H4SD  | 110.3      |

|               |          |                |       |
|---------------|----------|----------------|-------|
| C3S-C4S-H4SD  | 110.3    | H4SC-C4S-H4SD  | 108.5 |
| O1S-C1SA-C2S  | 105.8(3) | O1S-C1SA-H1SA  | 110.6 |
| C2S-C1SA-H1SA | 110.6    | O1S-C1SA-H1SB  | 110.6 |
| C2S-C1SA-H1SB | 110.6    | H1SA-C1SA-H1SB | 108.7 |
| C2S-C1SB-O1S  | 107.3(6) | C2S-C1SB-H1SC  | 110.3 |
| O1S-C1SB-H1SC | 110.3    | C2S-C1SB-H1SD  | 110.3 |
| O1S-C1SB-H1SD | 110.3    | H1SC-C1SB-H1SD | 108.5 |

**Table 6. Torsion angles (°) for bam126.**

|                  |             |                  |             |
|------------------|-------------|------------------|-------------|
| C24-C1-C2-C3     | -1.1(2)     | C5-N4-C3-C2      | 177.27(12)  |
| C5-N4-C3-C26     | -1.93(19)   | C1-C2-C3-N4      | -177.29(14) |
| C1-C2-C3-C26     | 1.9(2)      | C3-N4-C5-C6      | -176.74(12) |
| C3-N4-C5-C28     | 4.08(19)    | C7-C6-C5-N4      | -177.76(12) |
| C7-C6-C5-C28     | 1.4(2)      | C5-C6-C7-N8      | 178.66(13)  |
| C5-C6-C7-C30     | 0.1(2)      | N31-C9-N8-C7     | -0.63(16)   |
| C10-C9-N8-C7     | 176.98(12)  | C6-C7-N8-C9      | -178.17(14) |
| C30-C7-N8-C9     | 0.49(15)    | N8-C9-C10-C11    | -170.37(13) |
| N31-C9-C10-C11   | 6.9(2)      | N8-C9-C10-C15    | 6.8(2)      |
| N31-C9-C10-C15   | -175.87(13) | C15-C10-C11-C12  | -0.2(2)     |
| C9-C10-C11-C12   | 176.93(13)  | C10-C11-C12-C13  | 0.6(2)      |
| C10-C11-C12-C16  | -175.16(12) | C11-C12-C13-C14  | -0.5(2)     |
| C16-C12-C13-C14  | 175.14(13)  | C12-C13-C14-C15  | 0.1(2)      |
| C12-C13-C14-C20  | -178.39(13) | C13-C14-C15-O1   | -179.78(13) |
| C20-C14-C15-O1   | -1.2(2)     | C13-C14-C15-C10  | 0.2(2)      |
| C20-C14-C15-C10  | 178.75(13)  | C11-C10-C15-O1   | 179.83(13)  |
| C9-C10-C15-O1    | 2.6(2)      | C11-C10-C15-C14  | -0.2(2)     |
| C9-C10-C15-C14   | -177.38(13) | C11-C12-C16-C17  | -48.24(17)  |
| C13-C12-C16-C17  | 136.27(14)  | C11-C12-C16-C18  | -168.78(13) |
| C13-C12-C16-C18  | 15.72(19)   | C11-C12-C16-C19  | 70.95(16)   |
| C13-C12-C16-C19  | -104.54(15) | C13-C14-C20-C23  | 0.6(2)      |
| C15-C14-C20-C23  | -177.90(13) | C13-C14-C20-C22  | -118.73(15) |
| C15-C14-C20-C22  | 62.80(17)   | C13-C14-C20-C21  | 119.57(15)  |
| C15-C14-C20-C21  | -58.90(18)  | C2-C1-C24-C25    | -0.7(3)     |
| C1-C24-C25-C26   | 1.6(2)      | C24-C25-C26-N27  | 179.64(14)  |
| C24-C25-C26-C3   | -0.7(2)     | N4-C3-C26-N27    | -2.2(2)     |
| C2-C3-C26-N27    | 178.59(13)  | N4-C3-C26-C25    | 178.16(13)  |
| C2-C3-C26-C25    | -1.0(2)     | C25-C26-N27-C28  | -176.42(13) |
| C3-C26-N27-C28   | 3.94(19)    | C26-N27-C28-C29  | 178.49(12)  |
| C26-N27-C28-C5   | -1.76(19)   | N4-C5-C28-N27    | -2.35(19)   |
| C6-C5-C28-N27    | 178.48(12)  | N4-C5-C28-C29    | 177.39(12)  |
| C6-C5-C28-C29    | -1.77(19)   | N27-C28-C29-C30  | -179.80(12) |
| C5-C28-C29-C30   | 0.44(19)    | C28-C29-C30-N31  | -179.01(13) |
| C28-C29-C30-C7   | 1.2(2)      | C6-C7-C30-C29    | -1.5(2)     |
| N8-C7-C30-C29    | 179.69(13)  | C6-C7-C30-N31    | 178.61(13)  |
| N8-C7-C30-N31    | -0.18(14)   | N8-C9-N31-C30    | 0.53(16)    |
| C10-C9-N31-C30   | -177.03(12) | C29-C30-N31-C9   | 179.96(14)  |
| C7-C30-N31-C9    | -0.19(14)   | C1SB-C2S-C3S-C4S | 28.9(9)     |
| C1SA-C2S-C3S-C4S | -1.6(4)     | C1SA-O1S-C4S-C3S | 40.0(5)     |
| C1SB-O1S-C4S-C3S | 7.3(9)      | C2S-C3S-C4S-O1S  | -22.3(3)    |
| C4S-O1S-C1SA-C2S | -40.3(6)    | C3S-C2S-C1SA-O1S | 25.8(6)     |
| C3S-C2S-C1SB-O1S | -25.1(13)   | C4S-O1S-C1SB-C2S | 11.4(14)    |

**Table 7. Anisotropic atomic displacement parameters ( $\text{\AA}^2$ ) for bam126.**

The anisotropic atomic displacement factor exponent takes the form:  $-2\pi^2[ h^2 a^{*2} U_{11} + \dots + 2 h k a^* b^* U_{12} ]$

|      | $U_{11}$   | $U_{22}$   | $U_{33}$   | $U_{23}$   | $U_{13}$   | $U_{12}$   |
|------|------------|------------|------------|------------|------------|------------|
| O1   | 0.0427(6)  | 0.0322(6)  | 0.0458(6)  | 0.0235(5)  | 0.0261(5)  | 0.0234(5)  |
| C1   | 0.0407(9)  | 0.0292(8)  | 0.0391(8)  | 0.0206(6)  | 0.0117(7)  | 0.0073(6)  |
| C2   | 0.0386(8)  | 0.0237(7)  | 0.0347(8)  | 0.0145(6)  | 0.0112(6)  | 0.0107(6)  |
| N4   | 0.0296(6)  | 0.0193(5)  | 0.0262(6)  | 0.0089(4)  | 0.0071(5)  | 0.0072(5)  |
| C3   | 0.0257(7)  | 0.0194(6)  | 0.0244(6)  | 0.0078(5)  | 0.0036(5)  | 0.0046(5)  |
| C6   | 0.0302(7)  | 0.0200(6)  | 0.0269(7)  | 0.0083(5)  | 0.0108(5)  | 0.0113(5)  |
| C5   | 0.0243(6)  | 0.0171(6)  | 0.0221(6)  | 0.0061(5)  | 0.0045(5)  | 0.0051(5)  |
| C7   | 0.0254(6)  | 0.0203(6)  | 0.0216(6)  | 0.0062(5)  | 0.0076(5)  | 0.0071(5)  |
| C9   | 0.0257(6)  | 0.0220(6)  | 0.0221(6)  | 0.0075(5)  | 0.0074(5)  | 0.0081(5)  |
| N8   | 0.0318(6)  | 0.0229(6)  | 0.0269(6)  | 0.0113(5)  | 0.0130(5)  | 0.0114(5)  |
| C10  | 0.0253(6)  | 0.0221(6)  | 0.0221(6)  | 0.0087(5)  | 0.0092(5)  | 0.0082(5)  |
| C11  | 0.0255(6)  | 0.0238(6)  | 0.0238(6)  | 0.0085(5)  | 0.0098(5)  | 0.0099(5)  |
| C12  | 0.0247(6)  | 0.0226(6)  | 0.0229(6)  | 0.0080(5)  | 0.0071(5)  | 0.0080(5)  |
| C13  | 0.0284(7)  | 0.0242(6)  | 0.0234(6)  | 0.0096(5)  | 0.0107(5)  | 0.0080(5)  |
| C14  | 0.0260(7)  | 0.0235(6)  | 0.0252(6)  | 0.0067(5)  | 0.0104(5)  | 0.0082(5)  |
| C15  | 0.0283(7)  | 0.0225(6)  | 0.0265(7)  | 0.0095(5)  | 0.0098(5)  | 0.0111(5)  |
| C16  | 0.0284(7)  | 0.0258(7)  | 0.0271(7)  | 0.0131(5)  | 0.0107(5)  | 0.0118(5)  |
| C17  | 0.0342(8)  | 0.0268(7)  | 0.0336(8)  | 0.0097(6)  | 0.0109(6)  | 0.0132(6)  |
| C18  | 0.0467(9)  | 0.0404(9)  | 0.0493(10) | 0.0297(8)  | 0.0266(8)  | 0.0217(7)  |
| C19  | 0.0344(8)  | 0.0365(8)  | 0.0366(8)  | 0.0117(7)  | 0.0014(7)  | 0.0117(7)  |
| C20  | 0.0327(7)  | 0.0263(7)  | 0.0308(7)  | 0.0088(6)  | 0.0163(6)  | 0.0121(6)  |
| O1W  | 0.0326(6)  | 0.0281(6)  | 0.0454(7)  | 0.0060(5)  | 0.0107(5)  | 0.0149(5)  |
| C21  | 0.0486(10) | 0.0315(8)  | 0.0396(9)  | 0.0018(7)  | 0.0208(8)  | 0.0105(7)  |
| C22  | 0.0330(8)  | 0.0331(8)  | 0.0422(9)  | 0.0132(7)  | 0.0166(7)  | 0.0152(6)  |
| C24  | 0.0375(8)  | 0.0353(8)  | 0.0393(8)  | 0.0207(7)  | 0.0170(7)  | 0.0080(7)  |
| C25  | 0.0319(7)  | 0.0302(7)  | 0.0383(8)  | 0.0166(6)  | 0.0160(6)  | 0.0102(6)  |
| C26  | 0.0239(6)  | 0.0216(6)  | 0.0259(7)  | 0.0096(5)  | 0.0057(5)  | 0.0049(5)  |
| N27  | 0.0260(6)  | 0.0218(5)  | 0.0287(6)  | 0.0115(5)  | 0.0096(5)  | 0.0076(4)  |
| C28  | 0.0216(6)  | 0.0183(6)  | 0.0229(6)  | 0.0067(5)  | 0.0053(5)  | 0.0052(5)  |
| C29  | 0.0262(6)  | 0.0184(6)  | 0.0272(7)  | 0.0091(5)  | 0.0089(5)  | 0.0091(5)  |
| C30  | 0.0243(6)  | 0.0178(6)  | 0.0224(6)  | 0.0077(5)  | 0.0053(5)  | 0.0061(5)  |
| N31  | 0.0279(6)  | 0.0203(5)  | 0.0270(6)  | 0.0112(4)  | 0.0117(5)  | 0.0106(4)  |
| C23  | 0.0420(9)  | 0.0414(9)  | 0.0379(8)  | 0.0165(7)  | 0.0252(7)  | 0.0184(7)  |
| O1S  | 0.0827(11) | 0.0466(8)  | 0.0621(9)  | 0.0276(7)  | 0.0173(8)  | 0.0124(8)  |
| C2S  | 0.115(2)   | 0.0395(11) | 0.0775(16) | 0.0226(11) | 0.0474(15) | 0.0201(12) |
| C3S  | 0.0792(15) | 0.0646(14) | 0.0561(12) | 0.0323(11) | 0.0308(11) | 0.0314(12) |
| C4S  | 0.0937(18) | 0.0544(13) | 0.0657(14) | 0.0187(11) | 0.0272(13) | 0.0376(13) |
| C1SA | 0.070(3)   | 0.047(2)   | 0.0398(18) | 0.0138(14) | 0.009(2)   | -0.005(2)  |
| C1SB | 0.096(9)   | 0.047(4)   | 0.047(4)   | 0.008(3)   | 0.020(5)   | 0.022(5)   |

**Table 8. Hydrogen atomic coordinates and isotropic atomic displacement parameters ( $\text{\AA}^2$ ) for bam126.**

|     | $x/a$    | $y/b$    | $z/c$      | $U(\text{eq})$ |
|-----|----------|----------|------------|----------------|
| H1  | 0.3883   | 0.6985   | 0.6782     | 0.051          |
| H1W | 0.887(2) | 0.289(2) | 0.5765(12) | 0.041          |

|      | x/a      | y/b      | z/c        | U(eq) |
|------|----------|----------|------------|-------|
| H1A  | 0.9423   | 1.1887   | 0.2807     | 0.041 |
| H2   | 0.8027   | 1.1799   | 0.3791     | 0.037 |
| H2W  | 0.748(2) | 0.203(2) | 0.5273(12) | 0.037 |
| H6   | 0.5755   | 0.9175   | 0.5491     | 0.029 |
| H11  | 0.6386   | 0.3574   | 0.6859     | 0.028 |
| H13  | 0.3649   | 0.3373   | 0.8438     | 0.029 |
| H17A | 0.4913   | 0.0530   | 0.6805     | 0.045 |
| H17B | 0.6437   | 0.0288   | 0.7369     | 0.045 |
| H17C | 0.6537   | 0.1431   | 0.6858     | 0.045 |
| H18A | 0.3851   | 0.0976   | 0.8116     | 0.058 |
| H18B | 0.4948   | 0.1986   | 0.9007     | 0.058 |
| H18C | 0.5347   | 0.0563   | 0.8583     | 0.058 |
| H19A | 0.7974   | 0.2063   | 0.8751     | 0.055 |
| H19B | 0.7462   | 0.3471   | 0.9077     | 0.055 |
| H19C | 0.8114   | 0.3229   | 0.8260     | 0.055 |
| H21A | 0.3050   | 0.7613   | 0.8441     | 0.06  |
| H21B | 0.3827   | 0.7151   | 0.9256     | 0.06  |
| H21C | 0.2133   | 0.7386   | 0.9119     | 0.06  |
| H22A | 0.0901   | 0.5790   | 0.7175     | 0.051 |
| H22B | -0.0021  | 0.5750   | 0.7873     | 0.051 |
| H22C | 0.0229   | 0.4341   | 0.7319     | 0.051 |
| H24  | 1.0675   | 1.0090   | 0.2372     | 0.041 |
| H25  | 1.0557   | 0.8218   | 0.2954     | 0.037 |
| H29  | 0.8571   | 0.5672   | 0.4767     | 0.027 |
| H31  | 0.7069   | 0.4557   | 0.5871     | 0.028 |
| H23A | 0.1406   | 0.3690   | 0.8630     | 0.054 |
| H23B | 0.1063   | 0.5043   | 0.9190     | 0.054 |
| H23C | 0.2745   | 0.4778   | 0.9393     | 0.054 |
| H2SA | 0.7030   | 0.6301   | 0.9065     | 0.087 |
| H2SB | 0.8829   | 0.6797   | 0.9179     | 0.087 |
| H3SA | 0.7259   | 0.7861   | 1.0309     | 0.072 |
| H3SB | 0.9064   | 0.8325   | 1.0437     | 0.072 |
| H4SC | 0.6763   | 0.9582   | 0.9734     | 0.081 |
| H4SD | 0.8519   | 1.0314   | 1.0226     | 0.081 |
| H1SA | 0.7977   | 0.7701   | 0.8041     | 0.067 |
| H1SB | 0.6405   | 0.7833   | 0.8272     | 0.067 |
| H1SC | 0.7782   | 0.7524   | 0.8043     | 0.077 |
| H1SD | 0.9472   | 0.7976   | 0.8686     | 0.077 |

**Table 9. Hydrogen bond distances (Å) and angles (°) for bam126.**

|               | Donor-H | Acceptor-H | Donor-Acceptor | Angle     |
|---------------|---------|------------|----------------|-----------|
| O1-H1...N8    | 0.82    | 1.81       | 2.5583(15)     | 150.2     |
| O1W-H1W...N27 | 0.89(2) | 2.02(2)    | 2.8742(16)     | 162.0(18) |
| C2-H2...O1    | 0.93    | 2.64       | 3.3375(17)     | 131.9     |
| O1W-H2W...N4  | 0.84(2) | 2.27(2)    | 3.0644(16)     | 156.8(17) |
| N31-H31...O1W | 0.86    | 1.95       | 2.7953(15)     | 168.4     |

**UO<sub>2</sub>[L1](OAc)(DMSO)**

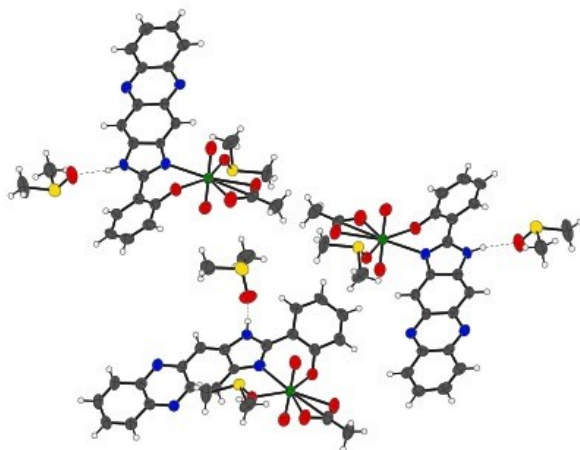

**Table 1 Crystal data and structure refinement for bam115bJN091119.**

|                     |                                                                                |
|---------------------|--------------------------------------------------------------------------------|
| Identification code | bam115bJN091119                                                                |
| Empirical formula   | C <sub>25</sub> H <sub>26</sub> N <sub>4</sub> O <sub>7</sub> S <sub>2</sub> U |
| Formula weight      | 796.65                                                                         |
| Temperature/K       | 273.(2)                                                                        |
| Crystal system      | monoclinic                                                                     |
| Space group         | P2 <sub>1</sub> /n                                                             |
| a/Å                 | 8.585(5)                                                                       |
| b/Å                 | 20.419(11)                                                                     |

|                                                |                                                                  |
|------------------------------------------------|------------------------------------------------------------------|
| c/Å                                            | 16.091(9)                                                        |
| $\alpha/^\circ$                                | 90                                                               |
| $\beta/^\circ$                                 | 101.633(8)                                                       |
| $\gamma/^\circ$                                | 90                                                               |
| Volume/Å <sup>3</sup>                          | 2763.(3)                                                         |
| Z                                              | 4                                                                |
| $\rho_{\text{calc}}/\text{g}/\text{cm}^3$      | 1.915                                                            |
| $\mu/\text{mm}^{-1}$                           | 6.077                                                            |
| F(000)                                         | 1536.0                                                           |
| Crystal size/mm <sup>3</sup>                   | 0.100 × 0.100 × 0.100                                            |
| Radiation                                      | Mo K $\alpha$ ( $\lambda = 0.71073$ )                            |
| 2 $\theta$ range for data collection/ $^\circ$ | 3.26 to 53.14                                                    |
| Index ranges                                   | -10 ≤ h ≤ 10, -25 ≤ k ≤ 25, -20 ≤ l ≤ 20                         |
| Reflections collected                          | 33110                                                            |
| Independent reflections                        | 5707 [ $R_{\text{int}} = 0.0639$ , $R_{\text{sigma}} = 0.0441$ ] |
| Data/restraints/parameters                     | 5707/11/357                                                      |
| Goodness-of-fit on F <sup>2</sup>              | 1.069                                                            |
| Final R indexes [ $I \geq 2\sigma(I)$ ]        | $R_1 = 0.0450$ , $wR_2 = 0.1157$                                 |
| Final R indexes [all data]                     | $R_1 = 0.0602$ , $wR_2 = 0.1281$                                 |
| Largest diff. peak/hole / e Å <sup>-3</sup>    | 3.75/-1.15                                                       |

**Table S2 Fractional Atomic Coordinates ( $\times 10^4$ ) and Equivalent Isotropic Displacement Parameters ( $\text{Å}^2 \times 10^3$ ) for bam115bJN091119.  $U_{\text{eq}}$  is defined as 1/3 of of the trace of the orthogonalised  $U_{ij}$  tensor.**

| Atom | x          | y           | z           | U(eq)      |
|------|------------|-------------|-------------|------------|
| U1   | 5964.3 (3) | 2095.5 (2)  | 6340.5 (2)  | 28.97 (11) |
| S1S  | 3327 (3)   | 5481.4 (11) | 8541.1 (14) | 48.9 (5)   |
| S1   | 4087 (2)   | 2546.0 (8)  | 4221.5 (12) | 34.2 (4)   |
| N1   | 5311 (7)   | 4237 (3)    | 7257 (4)    | 32.1 (13)  |
| O1   | 6239 (6)   | 2271 (2)    | 7719 (3)    | 35.9 (11)  |
| C1   | 5278 (9)   | 2571 (3)    | 8144 (4)    | 32.2 (15)  |
| N2   | 7220 (7)   | 5690 (3)    | 5277 (4)    | 33.1 (13)  |
| O2   | 8035 (7)   | 2151 (2)    | 6421 (3)    | 39.3 (12)  |
| C2   | 4843 (10)  | 2262 (4)    | 8842 (5)    | 37.8 (16)  |
| N3   | 8000 (7)   | 4521 (3)    | 4478 (4)    | 29.9 (12)  |
| O3   | 3872 (8)   | 2066 (2)    | 6237 (4)    | 42.5 (13)  |
| C3   | 3955 (10)  | 2585 (4)    | 9327 (5)    | 42.6 (18)  |
| O4   | 6245 (8)   | 989 (3)     | 6907 (4)    | 52.5 (16)  |
| N4   | 5838 (7)   | 3327 (3)    | 6622 (4)    | 32.2 (13)  |
| C4   | 3396 (10)  | 3210 (4)    | 9117 (5)    | 42.5 (18)  |



|     |           |          |          |           |
|-----|-----------|----------|----------|-----------|
| C5  | 3776 (9)  | 3528 (4) | 8424 (5) | 35.4 (16) |
| O5  | 5879 (7)  | 1063 (2) | 5534 (3) | 46.4 (14) |
| C6  | 4733 (8)  | 3214 (3) | 7933 (4) | 32.0 (15) |
| O6  | 5544 (6)  | 2470 (2) | 4943 (3) | 32.3 (10) |
| C7  | 5292 (8)  | 3576 (3) | 7256 (4) | 30.8 (15) |
| C8  | 5942 (8)  | 4451 (3) | 6568 (4) | 30.2 (14) |
| C9  | 6264 (9)  | 5051 (3) | 6310 (4) | 32.3 (15) |
| C10 | 6933 (9)  | 5090 (3) | 5567 (4) | 29.8 (14) |
| C19 | 6262 (8)  | 3842 (3) | 6184 (4) | 24.4 (12) |
| C18 | 6965 (9)  | 3881 (3) | 5477 (4) | 30.6 (14) |
| C17 | 7305 (8)  | 4501 (3) | 5156 (4) | 27.3 (13) |
| C16 | 8314 (8)  | 5120 (3) | 4207 (4) | 31.6 (15) |
| C15 | 9089 (8)  | 5176 (4) | 3495 (5) | 35.8 (16) |
| C14 | 9409 (9)  | 5778 (4) | 3206 (5) | 38.0 (17) |
| C11 | 7914 (8)  | 5706 (3) | 4593 (4) | 30.4 (14) |
| C12 | 8239 (9)  | 6320 (4) | 4252 (5) | 38.0 (17) |
| C20 | 6123 (10) | 723 (4)  | 6191 (6) | 44 (2)    |
| C1S | 3325 (13) | 6130 (5) | 7820 (6) | 61 (2)    |
| O1S | 4765 (9)  | 5086 (3) | 8480 (4) | 64.7 (19) |
| C21 | 6212 (12) | -6 (4)   | 6148 (7) | 58 (2)    |
| C22 | 4758 (13) | 3130 (5) | 3565 (6) | 58 (3)    |
| C23 | 4134 (11) | 1826 (4) | 3606 (6) | 54 (2)    |
| C2S | 3900 (15) | 5933 (6) | 9491 (6) | 77 (4)    |
| C13 | 8940 (9)  | 6351 (4) | 3581 (5) | 40.6 (18) |

**Table 3 Anisotropic Displacement Parameters ( $\text{\AA}^2 \times 10^3$ ) for bam115bJN091119. The Anisotropic displacement factor exponent takes the form: -  $2\pi^2[h^2a^2U_{11}+2hka*b*U_{12}+...]$ .**

| Atom | $U_{11}$   | $U_{22}$   | $U_{33}$   | $U_{12}$   | $U_{13}$  | $U_{23}$ |
|------|------------|------------|------------|------------|-----------|----------|
| U1   | 35.45 (18) | 25.03 (15) | 26.53 (16) | -0.96 (10) | 6.49 (11) | 0.39 (9) |
| S1S  | 50.8 (13)  | 53.2 (12)  | 44.3 (12)  | -4.3 (10)  | 13.7 (10) | -6.5 (9) |
| S1   | 36.3 (10)  | 30.1 (8)   | 34.9 (9)   | 1.5 (7)    | 4.5 (8)   | -0.3 (7) |
| N1   | 44 (4)     | 28 (3)     | 27 (3)     | 3 (2)      | 15 (3)    | -3 (2)   |
| O1   | 45 (3)     | 33 (2)     | 30 (3)     | 5 (2)      | 8 (2)     | 1 (2)    |
| C1   | 35 (4)     | 34 (3)     | 26 (3)     | -4 (3)     | 3 (3)     | -1 (3)   |
| N2   | 38 (3)     | 28 (3)     | 32 (3)     | -2 (2)     | 4 (3)     | 0 (2)    |

|     |           |           |           |         |          |          |
|-----|-----------|-----------|-----------|---------|----------|----------|
| O2  | 51 (3)    | 39 (3)    | 25 (3)    | 3 (2)   | -1 (2)   | -1 (2)   |
| C2  | 39 (4)    | 42 (4)    | 34 (4)    | -5 (3)  | 8 (3)    | 5 (3)    |
| N3  | 29 (3)    | 30 (3)    | 30 (3)    | -2 (2)  | 4 (2)    | 0 (2)    |
| O3  | 53 (4)    | 37 (3)    | 36 (3)    | -6 (2)  | 7 (3)    | 1 (2)    |
| C3  | 42 (5)    | 52 (5)    | 36 (4)    | -6 (4)  | 14 (4)   | 7 (3)    |
| O4  | 88 (5)    | 30 (3)    | 41 (3)    | 4 (3)   | 15 (3)   | 8 (2)    |
| N4  | 37 (3)    | 27 (3)    | 33 (3)    | -1 (2)  | 6 (3)    | -6 (2)   |
| C4  | 38 (4)    | 59 (5)    | 35 (4)    | -7 (4)  | 18 (3)   | -5 (4)   |
| C5  | 31 (4)    | 39 (4)    | 37 (4)    | 0 (3)   | 10 (3)   | -4 (3)   |
| O5  | 72 (4)    | 28 (2)    | 37 (3)    | -2 (2)  | 6 (3)    | -1 (2)   |
| C6  | 30 (4)    | 38 (4)    | 28 (3)    | -1 (3)  | 5 (3)    | 0 (3)    |
| O6  | 38 (3)    | 31 (2)    | 28 (2)    | -1 (2)  | 5 (2)    | 1.0 (19) |
| C7  | 33 (4)    | 34 (3)    | 23 (3)    | 0 (3)   | -2 (3)   | -1 (3)   |
| C8  | 30 (4)    | 32 (3)    | 28 (3)    | 2 (3)   | 2 (3)    | -1 (3)   |
| C9  | 45 (4)    | 24 (3)    | 29 (4)    | 0 (3)   | 10 (3)   | -4 (3)   |
| C10 | 37 (4)    | 24 (3)    | 25 (3)    | 1 (3)   | -1 (3)   | 1 (2)    |
| C19 | 24.4 (15) | 23.7 (15) | 24.1 (15) | 2.5 (9) | 2.4 (10) | -2.7 (9) |
| C18 | 40 (4)    | 23 (3)    | 30 (3)    | 0 (3)   | 9 (3)    | -1 (3)   |
| C17 | 30 (4)    | 28 (3)    | 22 (3)    | 2 (3)   | 0 (3)    | -3 (2)   |
| C16 | 29 (4)    | 37 (4)    | 29 (4)    | -2 (3)  | 5 (3)    | 2 (3)    |
| C15 | 31 (4)    | 38 (4)    | 36 (4)    | -4 (3)  | 0 (3)    | 1 (3)    |
| C14 | 43 (4)    | 43 (4)    | 29 (4)    | -5 (3)  | 8 (3)    | 7 (3)    |
| C11 | 28 (4)    | 30 (3)    | 30 (4)    | -4 (3)  | -2 (3)   | -2 (3)   |
| C12 | 42 (4)    | 31 (3)    | 38 (4)    | -5 (3)  | 0 (3)    | 8 (3)    |
| C20 | 55 (5)    | 23 (3)    | 55 (5)    | -7 (3)  | 16 (4)   | 2 (3)    |
| C1S | 79 (7)    | 57 (5)    | 49 (5)    | 2 (5)   | 23 (5)   | -7 (4)   |
| O1S | 77 (5)    | 55 (4)    | 64 (4)    | 17 (3)  | 20 (4)   | -20 (3)  |
| C21 | 72 (7)    | 27 (4)    | 72 (6)    | -4 (4)  | 10 (5)   | 8 (4)    |
| C22 | 71 (6)    | 51 (5)    | 42 (5)    | -20 (5) | -13 (4)  | 17 (4)   |
| C23 | 57 (6)    | 37 (4)    | 58 (6)    | 8 (4)   | -14 (5)  | -20 (4)  |
| C2S | 108 (9)   | 75 (7)    | 44 (5)    | 37 (6)  | 8 (6)    | -20 (5)  |
| C13 | 43 (5)    | 41 (4)    | 33 (4)    | -7 (3)  | -3 (3)   | 13 (3)   |

**Table 4 Bond Lengths for bam115bjN091119.**

| Atom | Atom | Length/Å  | Atom | Atom | Length/Å   |
|------|------|-----------|------|------|------------|
| U1   | O2   | 1.760 (6) | N3   | C17  | 1.346 (9)  |
| U1   | O3   | 1.772 (6) | C3   | C4   | 1.380 (12) |
| U1   | O1   | 2.213 (5) | O4   | C20  | 1.259 (10) |
| U1   | O6   | 2.333 (5) | N4   | C7   | 1.308 (9)  |

|     |     |           |     |     |           |
|-----|-----|-----------|-----|-----|-----------|
| U1  | O4  | 2.430(5)  | N4  | C19 | 1.356(9)  |
| U1  | O5  | 2.468(5)  | C4  | C5  | 1.385(11) |
| U1  | N4  | 2.562(6)  | C5  | C6  | 1.404(10) |
| U1  | C20 | 2.819(8)  | O5  | C20 | 1.248(10) |
| S1S | O1S | 1.495(7)  | C6  | C7  | 1.476(10) |
| S1S | C1S | 1.761(10) | C8  | C9  | 1.340(10) |
| S1S | C2S | 1.769(10) | C8  | C19 | 1.438(9)  |
| S1  | O6  | 1.534(5)  | C9  | C10 | 1.429(10) |
| S1  | C22 | 1.765(9)  | C10 | C17 | 1.439(9)  |
| S1  | C23 | 1.778(8)  | C19 | C18 | 1.393(9)  |
| N1  | C7  | 1.350(9)  | C18 | C17 | 1.419(9)  |
| N1  | C8  | 1.399(9)  | C16 | C11 | 1.422(10) |
| O1  | C1  | 1.323(9)  | C16 | C15 | 1.441(10) |
| C1  | C2  | 1.403(10) | C15 | C14 | 1.362(10) |
| C1  | C6  | 1.411(10) | C14 | C13 | 1.412(11) |
| N2  | C10 | 1.351(8)  | C11 | C12 | 1.420(9)  |
| N2  | C11 | 1.353(9)  | C12 | C13 | 1.340(11) |
| C2  | C3  | 1.366(11) | C20 | C21 | 1.491(11) |
| N3  | C16 | 1.345(9)  |     |     |           |

**Table 5 Bond Angles for bam115bJN091119.**

| Atom | Atom | Atom | Angle/°    | Atom | Atom | Atom | Angle/°  |
|------|------|------|------------|------|------|------|----------|
| O2   | U1   | O3   | 178.0(2)   | C7   | N4   | C19  | 106.3(6) |
| O2   | U1   | O1   | 90.8(2)    | C7   | N4   | U1   | 123.6(5) |
| O3   | U1   | O1   | 90.0(2)    | C19  | N4   | U1   | 130.1(4) |
| O2   | U1   | O6   | 90.4(2)    | C3   | C4   | C5   | 120.1(7) |
| O3   | U1   | O6   | 87.9(2)    | C4   | C5   | C6   | 119.9(7) |
| O1   | U1   | O6   | 151.37(17) | C20  | O5   | U1   | 92.8(5)  |
| O2   | U1   | O4   | 90.6(2)    | C5   | C6   | C1   | 119.5(6) |
| O3   | U1   | O4   | 91.5(2)    | C5   | C6   | C7   | 120.1(6) |
| O1   | U1   | O4   | 77.99(19)  | C1   | C6   | C7   | 120.1(6) |
| O6   | U1   | O4   | 130.60(18) | S1   | O6   | U1   | 135.0(3) |
| O2   | U1   | O5   | 90.9(2)    | N4   | C7   | N1   | 112.6(6) |
| O3   | U1   | O5   | 90.0(2)    | N4   | C7   | C6   | 127.1(6) |
| O1   | U1   | O5   | 130.64(17) | N1   | C7   | C6   | 120.4(6) |
| O6   | U1   | O5   | 77.93(17)  | C9   | C8   | N1   | 131.8(6) |
| O4   | U1   | O5   | 52.67(19)  | C9   | C8   | C19  | 126.0(7) |
| O2   | U1   | N4   | 90.1(2)    | N1   | C8   | C19  | 102.1(6) |
| O3   | U1   | N4   | 88.4(2)    | C8   | C9   | C10  | 116.9(6) |
| O1   | U1   | N4   | 70.34(19)  | N2   | C10  | C9   | 118.2(6) |
| O6   | U1   | N4   | 81.05(18)  | N2   | C10  | C17  | 121.7(6) |

|     |     |     |             |     |     |     |           |
|-----|-----|-----|-------------|-----|-----|-----|-----------|
| O4  | U1  | N4  | 148.3 (2)   | C9  | C10 | C17 | 120.1 (6) |
| O5  | U1  | N4  | 158.96 (19) | N4  | C19 | C18 | 132.4 (6) |
| O2  | U1  | C20 | 90.3 (2)    | N4  | C19 | C8  | 110.6 (6) |
| O3  | U1  | C20 | 91.3 (2)    | C18 | C19 | C8  | 116.9 (6) |
| O1  | U1  | C20 | 104.4 (2)   | C19 | C18 | C17 | 120.2 (6) |
| O6  | U1  | C20 | 104.2 (2)   | N3  | C17 | C18 | 118.6 (6) |
| O4  | U1  | C20 | 26.4 (2)    | N3  | C17 | C10 | 121.6 (6) |
| O5  | U1  | C20 | 26.2 (2)    | C18 | C17 | C10 | 119.8 (6) |
| N4  | U1  | C20 | 174.8 (2)   | N3  | C16 | C11 | 122.8 (6) |
| O1S | S1S | C1S | 104.7 (5)   | N3  | C16 | C15 | 119.0 (6) |
| O1S | S1S | C2S | 104.4 (5)   | C11 | C16 | C15 | 118.2 (6) |
| C1S | S1S | C2S | 98.1 (5)    | C14 | C15 | C16 | 120.0 (7) |
| O6  | S1  | C22 | 101.9 (4)   | C15 | C14 | C13 | 120.5 (7) |
| O6  | S1  | C23 | 103.4 (3)   | N2  | C11 | C12 | 119.3 (6) |
| C22 | S1  | C23 | 100.3 (5)   | N2  | C11 | C16 | 121.3 (6) |
| C7  | N1  | C8  | 108.5 (6)   | C12 | C11 | C16 | 119.4 (7) |
| C1  | O1  | U1  | 129.9 (5)   | C13 | C12 | C11 | 120.6 (7) |
| O1  | C1  | C2  | 120.0 (7)   | O5  | C20 | O4  | 120.2 (7) |
| O1  | C1  | C6  | 121.2 (6)   | O5  | C20 | C21 | 121.2 (8) |
| C2  | C1  | C6  | 118.8 (7)   | O4  | C20 | C21 | 118.5 (8) |
| C10 | N2  | C11 | 116.4 (6)   | O5  | C20 | U1  | 61.0 (4)  |
| C3  | C2  | C1  | 120.6 (7)   | O4  | C20 | U1  | 59.2 (4)  |
| C16 | N3  | C17 | 116.1 (6)   | C21 | C20 | U1  | 177.8 (7) |
| C2  | C3  | C4  | 121.0 (7)   | C12 | C13 | C14 | 121.2 (7) |
| C20 | O4  | U1  | 94.3 (5)    |     |     |     |           |

**Table 6 Hydrogen Bonds for bam115bJN091119.**

| D      | H    | A               | d(D-H)/Å | d(H-A)/Å | d(D-A)/Å   | D-H-A/° |
|--------|------|-----------------|----------|----------|------------|---------|
| N1     | H1   | O1S             | 0.86     | 1.89     | 2.732 (8)  | 167.2   |
| C18H18 | O6   |                 | 0.93     | 2.53     | 3.179 (8)  | 126.9   |
| C1S    | H01C | O3 <sup>1</sup> | 0.96     | 2.37     | 3.265 (11) | 155.0   |
| C22    | H01F | O1 <sup>2</sup> | 0.96     | 2.48     | 3.161 (11) | 127.9   |
| C23    | H00E | O1 <sup>2</sup> | 0.96     | 2.52     | 3.191 (10) | 127.0   |
| C2S    | H01I | O3 <sup>1</sup> | 0.96     | 2.55     | 3.356 (12) | 141.3   |

<sup>1</sup>1/2-X,1/2+Y,3/2-Z; <sup>2</sup>-1/2+X,1/2-Y,-1/2+Z

**Table 7 Torsion Angles for bam115bJN091119.**

| A   | B  | C   | D   | Angle/°   | A   | B   | C   | D   | Angle/°   |
|-----|----|-----|-----|-----------|-----|-----|-----|-----|-----------|
| U1  | O1 | C1  | C2  | 128.9(6)  | C7  | N4  | C19 | C8  | -0.6(8)   |
| U1  | O1 | C1  | C6  | -54.1(9)  | U1  | N4  | C19 | C8  | 178.6(4)  |
| O1  | C1 | C2  | C3  | 174.7(7)  | C9  | C8  | C19 | N4  | 177.9(7)  |
| C6  | C1 | C2  | C3  | -2.3(12)  | N1  | C8  | C19 | N4  | 0.2(7)    |
| C1  | C2 | C3  | C4  | 3.4(13)   | C9  | C8  | C19 | C18 | -0.3(10)  |
| C2  | C3 | C4  | C5  | -2.2(13)  | N1  | C8  | C19 | C18 | -177.9(6) |
| C3  | C4 | C5  | C6  | -0.1(12)  | N4  | C19 | C18 | C17 | -178.9(7) |
| C4  | C5 | C6  | C1  | 1.1(11)   | C8  | C19 | C18 | C17 | -1.2(10)  |
| C4  | C5 | C6  | C7  | -173.0(7) | C16 | N3  | C17 | C18 | -179.2(6) |
| O1  | C1 | C6  | C5  | -176.9(7) | C16 | N3  | C17 | C10 | -0.4(9)   |
| C2  | C1 | C6  | C5  | 0.1(11)   | C19 | C18 | C17 | N3  | 179.3(6)  |
| O1  | C1 | C6  | C7  | -2.9(10)  | C19 | C18 | C17 | C10 | 0.5(10)   |
| C2  | C1 | C6  | C7  | 174.1(7)  | N2  | C10 | C17 | N3  | 2.0(10)   |
| C22 | S1 | O6  | U1  | 159.1(5)  | C9  | C10 | C17 | N3  | -177.1(6) |
| C23 | S1 | O6  | U1  | -97.1(5)  | N2  | C10 | C17 | C18 | -179.2(7) |
| C19 | N4 | C7  | N1  | 0.8(8)    | C9  | C10 | C17 | C18 | 1.7(10)   |
| U1  | N4 | C7  | N1  | -178.5(4) | C17 | N3  | C16 | C11 | -1.4(10)  |
| C19 | N4 | C7  | C6  | -177.7(7) | C17 | N3  | C16 | C15 | 178.7(6)  |
| U1  | N4 | C7  | C6  | 3.0(10)   | N3  | C16 | C15 | C14 | 179.5(7)  |
| C8  | N1 | C7  | N4  | -0.7(8)   | C11 | C16 | C15 | C14 | -0.4(10)  |
| C8  | N1 | C7  | C6  | 178.0(6)  | C16 | C15 | C14 | C13 | -2.1(11)  |
| C5  | C6 | C7  | N4  | -161.8(7) | C10 | N2  | C11 | C12 | 179.6(6)  |
| C1  | C6 | C7  | N4  | 24.2(11)  | C10 | N2  | C11 | C16 | -0.1(10)  |
| C5  | C6 | C7  | N1  | 19.7(10)  | N3  | C16 | C11 | N2  | 1.7(11)   |
| C1  | C6 | C7  | N1  | -154.3(7) | C15 | C16 | C11 | N2  | -178.3(6) |
| C7  | N1 | C8  | C9  | -177.2(8) | N3  | C16 | C11 | C12 | -178.0(6) |
| C7  | N1 | C8  | C19 | 0.3(7)    | C15 | C16 | C11 | C12 | 2.0(10)   |
| N1  | C8 | C9  | C10 | 179.3(7)  | N2  | C11 | C12 | C13 | 179.3(7)  |
| C19 | C8 | C9  | C10 | 2.4(11)   | C16 | C11 | C12 | C13 | -1.1(11)  |
| C11 | N2 | C10 | C9  | 177.4(6)  | U1  | O5  | C20 | O4  | 2.2(9)    |
| C11 | N2 | C10 | C17 | -1.7(10)  | U1  | O5  | C20 | C21 | 179.8(8)  |
| C8  | C9 | C10 | N2  | 177.8(7)  | U1  | O4  | C20 | O5  | -2.2(9)   |
| C8  | C9 | C10 | C17 | -3.1(10)  | U1  | O4  | C20 | C21 | -179.9(7) |
| C7  | N4 | C19 | C18 | 177.1(7)  | C11 | C12 | C13 | C14 | -1.5(11)  |
| U1  | N4 | C19 | C18 | -3.7(11)  | C15 | C14 | C13 | C12 | 3.1(12)   |

**Table 8 Hydrogen Atom Coordinates ( $\text{\AA} \times 10^4$ ) and Isotropic Displacement Parameters ( $\text{\AA}^2 \times 10^3$ ) for bam115bJN091119.**

| Atom | x | y | z | U(eq) |
|------|---|---|---|-------|
|------|---|---|---|-------|

|      |         |         |         |     |
|------|---------|---------|---------|-----|
| H1   | 4990.19 | 4485.27 | 7620.79 | 38  |
| H2   | 5161.41 | 1832.58 | 8975.49 | 45  |
| H3   | 3724.1  | 2382.12 | 9804.65 | 51  |
| H4   | 2762.6  | 3418.34 | 9442.7  | 51  |
| H5   | 3397.17 | 3948.18 | 8283.48 | 43  |
| H9   | 6060.75 | 5424.51 | 6601.02 | 39  |
| H18  | 7211.72 | 3500    | 5214.72 | 37  |
| H15  | 9371.13 | 4800.87 | 3232.18 | 43  |
| H14  | 9941.06 | 5812.17 | 2758    | 46  |
| H12  | 7962.93 | 6704.89 | 4496.45 | 46  |
| H01A | 2999.64 | 5969.75 | 7250.75 | 91  |
| H01B | 4376.08 | 6311.15 | 7892.9  | 91  |
| H01C | 2598.86 | 6463.54 | 7923.65 | 91  |
| H00A | 5193.99 | -177.18 | 5879.59 | 87  |
| H00B | 6507.82 | -180.55 | 6712.13 | 87  |
| H00D | 6993.51 | -128.49 | 5826.11 | 87  |
| H01D | 5734.2  | 2981.78 | 3424.69 | 87  |
| H01E | 4935.39 | 3540.96 | 3859.75 | 87  |
| H01F | 3970.43 | 3185.95 | 3054.55 | 87  |
| H00E | 3326.81 | 1852.38 | 3098.98 | 81  |
| H00F | 3942.45 | 1450.12 | 3930.13 | 81  |
| H00G | 5158.21 | 1786.21 | 3457.9  | 81  |
| H01G | 4825.36 | 6189.93 | 9463.74 | 115 |
| H01H | 4140.24 | 5637.04 | 9963.41 | 115 |
| H01I | 3047.22 | 6217.76 | 9563.15 | 115 |
| H13  | 9121.69 | 6758.04 | 3357.57 | 49  |

## References

1. Sheldrick, G. M., *Acta Crystallogr., Sect. A: Found. Crystallogr.* **2008**, *A64*, 112.
2. Bruker Bruker AXS Inc.: Madison, Wisconsin, USA, 2001.
3. Dolomanov, O. V.; Bourhis, L. J.; Gildea, R. J.; Howard, J. A. K.; Puschmann, H., OLEX2: A complete structure solution, refinement and analysis program. *J. Appl. Cryst.* **2009**, *42*, 339-341.
